# Supplementary material for: Measurement of Higher Education Competitiveness Level and Regional Disparities in China from the Perspective of Sustainable Development
Source: publisher site journal article supplement (doi:10.1515/econ-2022-0122), 2024-01-01
Supplement: Supplementary file [file Original_submission.pdf]

# Economics

## Measurement of Higher Education Competitiveness Level and Regional Disparities in China from the Perspective of Sustainable Development --Manuscript Draft--

|                                     |                                                                                                                                                                                                                                                                                                                                                                                                                                                                                                                                                                                                                                                                                                                                                                                                                                                                                                                                                                                                                                                                                                                                                                                                                                                                                                                                                                                                          |
|-------------------------------------|----------------------------------------------------------------------------------------------------------------------------------------------------------------------------------------------------------------------------------------------------------------------------------------------------------------------------------------------------------------------------------------------------------------------------------------------------------------------------------------------------------------------------------------------------------------------------------------------------------------------------------------------------------------------------------------------------------------------------------------------------------------------------------------------------------------------------------------------------------------------------------------------------------------------------------------------------------------------------------------------------------------------------------------------------------------------------------------------------------------------------------------------------------------------------------------------------------------------------------------------------------------------------------------------------------------------------------------------------------------------------------------------------------|
| <b>Manuscript Number:</b>           | ECONJOURNAL-D-24-00010                                                                                                                                                                                                                                                                                                                                                                                                                                                                                                                                                                                                                                                                                                                                                                                                                                                                                                                                                                                                                                                                                                                                                                                                                                                                                                                                                                                   |
| <b>Full Title:</b>                  | Measurement of Higher Education Competitiveness Level and Regional Disparities in China from the Perspective of Sustainable Development                                                                                                                                                                                                                                                                                                                                                                                                                                                                                                                                                                                                                                                                                                                                                                                                                                                                                                                                                                                                                                                                                                                                                                                                                                                                  |
| <b>Article Type:</b>                | Research Article                                                                                                                                                                                                                                                                                                                                                                                                                                                                                                                                                                                                                                                                                                                                                                                                                                                                                                                                                                                                                                                                                                                                                                                                                                                                                                                                                                                         |
| <b>Keywords:</b>                    | Higher education; Competitiveness level; Regional disparities; Dynamic evolution                                                                                                                                                                                                                                                                                                                                                                                                                                                                                                                                                                                                                                                                                                                                                                                                                                                                                                                                                                                                                                                                                                                                                                                                                                                                                                                         |
| <b>Manuscript Region of Origin:</b> | CHINA                                                                                                                                                                                                                                                                                                                                                                                                                                                                                                                                                                                                                                                                                                                                                                                                                                                                                                                                                                                                                                                                                                                                                                                                                                                                                                                                                                                                    |
| <b>Abstract:</b>                    | <p>Based on panel data from 31 provinces in China from 2008 to 2020, this study utilizes the DPSIR model to construct a multidimensional evaluation index system for measuring China's higher education competitiveness level. The entropy weight TOPSIS method is employed to measure the higher education competitiveness level and analyze its spatio-temporal patterns. Traditional and spatial Kernel density estimation methods, as well as Markov chain analysis, are used to explore the dynamic evolution and long-term transfer trends of higher education competitiveness level. The Dagum Gini coefficient is employed to analyze the differences and sources of higher education competitiveness level. The research findings indicate that China's overall level of higher education competitiveness shows an increasing trend, with the eastern region having a significantly higher level compared to other regions. This study suggests integrating the concept of sustainable development, facing the gaps between regions, adopting tailored development strategies, and reducing the disparities in higher education competitiveness among regions. These policy insights aim to provide theoretical references and foundations for enhancing China's higher education competitiveness level, as well as promoting high-quality and sustainable development in higher education.</p> |
| <b>Manuscript Classifications:</b>  | 9: Health, Education, and Welfare                                                                                                                                                                                                                                                                                                                                                                                                                                                                                                                                                                                                                                                                                                                                                                                                                                                                                                                                                                                                                                                                                                                                                                                                                                                                                                                                                                        |

# Measurement of Higher Education Competitiveness Level and Regional Disparities in China from the Perspective of Sustainable Development

Yi Sun<sup>1</sup>, Jinxin Zhang<sup>2,\*</sup>, Kailong Yang<sup>2</sup>, Xiaoyue Zhu<sup>2</sup>

<sup>1</sup>School of Management, Wuhan Textile University, Wuhan 430077, China.

<sup>2</sup>Business School, Hubei University, Wuhan 430062, China.

\*Email of corresponding author: [zhangjinxin1988@163.com](mailto:zhangjinxin1988@163.com)

**Abstract:** Based on panel data from 31 provinces in China from 2008 to 2020, this study utilizes the DPSIR model to construct a multidimensional evaluation index system for measuring China's higher education competitiveness level. The entropy weight TOPSIS method is employed to measure the higher education competitiveness level and analyze its spatio-temporal patterns. Traditional and spatial Kernel density estimation methods, as well as Markov chain analysis, are used to explore the dynamic evolution and long-term transfer trends of higher education competitiveness level. The Dagum Gini coefficient is employed to analyze the differences and sources of higher education competitiveness level. The research findings indicate that China's overall level of higher education competitiveness shows an increasing trend, with the eastern region having a significantly higher level compared to other regions. This study suggests integrating the concept of sustainable development, facing the gaps between regions, adopting tailored development strategies, and reducing the disparities in higher education competitiveness among regions. These policy insights aim to provide theoretical references and foundations for enhancing China's higher education competitiveness level, as well as promoting high-quality and sustainable development in higher education.

**Keywords:** Higher education; Competitiveness level; Regional disparities; Dynamic evolution

## 1. Introduction

Education is an important cornerstone for national rejuvenation and social progress. As a crucial component creating a new development pattern of China's education system, higher education serves as a vital vehicle for promoting social progress and. It plays a key role in talent cultivation, scientific research, and social services. Furthermore, higher education is an important engine for national scientific and technological progress and social development. General Secretary Xi Jinping emphasized, "Higher education in our country should closely revolve around the goal of achieving the 'Two Centenary Goals' and realizing the Chinese dream of the great rejuvenation of the Chinese nation. We should attach greater importance to education work and the development of higher education, fully unleash the positive role of higher education in enhancing the comprehensive qualities of the people, improving the well-being of the people, promoting high-quality development, and enhancing overall national strength. Let higher education is of vital importance to china for the present and the future, continuously providing high-quality talents for the realization of the Chinese nation's great rejuvenation." Lin mentioned that higher education provides a large number of high-quality talents for the rapid development of modern society, serving as a human and technological reserve for promoting development and innovation in various fields of society. Higher education plays an irreplaceable role in enhancing the overall competitiveness of a country and society [1]. The level of competitiveness in higher education development is an important indicator of the level and potential of economic and social development [2]. Christian U et al. argue that improving the level of higher education competitiveness has an important promoting effect on the overall quality enhancement of students [3]. Enhancing the level of higher education competitiveness can provide strong support for making china a powerhouse in terms

of education, science and talents. It also benefits the steady improvement of the overall quality of the entire nation and the optimization of the labor force's quality structure [4], continuously providing intellectual and talent support for realizing the Chinese dream of the great rejuvenation of the Chinese nation.

In 2015, the 70th United Nations General Assembly adopted the "Transforming Our World: the 2030 Agenda for Sustainable Development," which highlights that higher education is a fundamental development goal for achieving education equity and sustainable development. It plays a crucial role in the path towards sustainable development in the future [5]. At the same time, sustainable development is both an objective requirement for higher education to adapt to high-quality economic and social development and a natural trend in its own development stage [6]. The higher education system is a complex system consisting of multiple factors and organizations at various levels and dimensions. It is worth conducting in-depth analysis and exploration of the development status of China's higher education competitiveness, regional disparities among provinces, and the sources of these disparities. To accurately present the current status and competitiveness level of higher education development, the choice of measurement models is of paramount importance. Additionally, it is necessary to analyze the current status and spatio-temporal disparities of China's higher education competitiveness from multiple perspectives comprehensively. Therefore, based on the framework of the DPSIR model, this paper combines the realistic conditions of China's higher education development environment and the causal relationships related to sustainable development in higher education to select various influencing factors and indicators that reflect China's higher education competitiveness level. This helps in constructing a more scientifically reasonable evaluation index system for China's higher education competitiveness level. This approach facilitates an accurate understanding of the current state of China's higher education competitiveness level and provides a research foundation for further exploring its development disparities.

Compared to previous studies, the existing literature still lacks in-depth research. To fill this gap, this study has three key objectives. Firstly, using the "Driving force-Pressure-State-Impact-Response" (DPSIR) framework and adopting the entropy weight Technique for Order of Preference by Similarity to Ideal Solution (TOPSIS) method, this paper constructs an evaluation model for measuring the competitiveness level of Chinese higher education from a sustainable development perspective. Secondly, this paper conducts a thorough analysis of the competitiveness level of Chinese higher education from dimensions such as temporal and spatial patterns and dynamic evolution trends. Thirdly, this paper examines the overall differences, interregional disparities, intraregional disparities, and sources of disparities in the competitiveness level of Chinese higher education. This paper not only helps uncover the spatio-temporal heterogeneity of the competitiveness level of Chinese higher education but also improves the measurement model for assessing its competitiveness level. Additionally, the analysis of disparities in the competitiveness level of higher education in this paper provides theoretical references and policy suggestions for the sustainable development of higher education.

To address these unresolved key issues, the remaining sections of the paper are divided into five parts. Part 2 provides a literature review. Part 3 describes the research methodology, data sources, and the process of constructing the evaluation index system for the competitiveness level of Chinese higher education. Part 4 analyzes the spatio-temporal patterns and dynamic evolution of the competitiveness level of Chinese higher education. Part 5 discusses the differences in the competitiveness level of Chinese higher education and their sources. Finally, the research conclusions, implications, suggestions, and future research are presented in Part 6.

## **2. Literature Review**

### *2.1. Competitiveness of higher education*

The competitiveness of higher education is one of the important areas of research in sustainable development of higher education. The study of higher education competitiveness initially emerged from research on corporate competitiveness [7-8], industrial competitiveness [9-10], and national competitiveness [11-12], and as the research progressed, competitiveness theories and research findings were gradually extended to the study of higher education competitiveness. The concept of higher education competitiveness originated from the field of international competitiveness [13]. In 1990, Michael Porter from Harvard Business School pointed out in his book "The Competitive Advantage of Nations" that the sole meaning of competitiveness or competitive advantage is productivity. Furthermore, the theory of national competitive advantage attempts to explain and interpret how nations create and maintain sustainable relative advantages [14]. In the context of higher education competitiveness, it represents the relative advantages and capabilities that the higher education system possesses in a particular region. Higher education is an important measure for labor force reproduction, as it transforms potential labor into actual labor, thereby further promoting productivity development. At the same time, higher education is also an important initiative for the reproduction and generation of scientific and technological knowledge. The improvement of higher education competitiveness is not only a fundamental requirement for building a strong higher education country, but also the fundamental approach to building a high-quality higher education system. As a subsystem within the larger social system, the higher education system plays an increasingly important role in its development process. In order to achieve high-quality and sustainable development of our higher education system, it is necessary to maintain a balance between the internal factors of higher education and the external environment. When measuring the level of higher education competitiveness, it is important to integrate the theories of competitive advantage and sustainable development, fully consider the driving forces and pressures faced by the higher education system, and combine the current status, impact, and system feedback and adjustment conditions to comprehensively present the level of higher education competitiveness in China from multiple perspectives.

The measurement of the level of higher education competitiveness is a crucial issue that lays the foundation for current and future research on higher education competitiveness. This method not only helps us gain a comprehensive understanding of the development status of regional higher education, but also provides theoretical guidance for the sustainable development of higher education in our country.

## *2.2. Evaluation Methods for Higher Education Competitiveness*

In order to present the current status and competitiveness of higher education in China scientifically and reasonably, the selection of measurement models is crucial. On one hand, scholars have also employed qualitative analysis methods to measure the level of higher education competitiveness [15-16]. Li et al. assessed the competitiveness level of universities using expert rating method [17]. Bileviciute Egle et al. used Mykolas Romeris University as an example to investigate both the level of higher education competitiveness and modern innovative management methods in universities [18]. Oswaldo Alfaro Bernedo et al. conducted research showing that the Unified Enterprise Architecture model is a powerful tool for supporting organizational management, which helps improve the functional competitiveness of universities and their overall competitiveness [19]. Yang et al. analyzed the international sustainable competitiveness of Chinese higher education based on the Diamond Model theory and proposed effective approaches to enhance China's sustainable competitiveness in the international education service market [20]. However, qualitative analysis methods often rely on the experience and intuition of the analysts, which can be subjective, and the evaluation of the research subject needs to be scientifically assessed from an objective perspective.

On the other hand, scholars have conducted quantitative data analysis by constructing evaluation models to explore the development status of higher education. Ana Carmen Estrada-Real et al. analyzed the competitiveness of higher education institutions using data from the QS World University Rankings. They constructed models using statistical and machine learning

algorithms from the library of R Studio software tool to predict the rankings of global universities and forecast the competitiveness level of world universities for the next decade [21]. M. Moskovkin et al. identified two indicators: the total number of universities in a country and the average ranking of these universities over a period of time. They normalized and weighted these indicators and used them to analyze the competitiveness level of universities in a country through case studies [22]. Kelly Anthony introduced the Herfindahl index to analyze the competitiveness level of certain disciplines within the UK higher education system [23]. The evaluation indicators mentioned in previous studies may not fully cover multiple factors in the system, neglecting comprehensive indicators and dynamic development. Some scholars have used higher education efficiency as a representation of higher education competitiveness [24]. For example, Naderi Abolghasem evaluated the competitiveness of faculties, colleges, and universities by analyzing the efficiency scores of two groups of departments in a comprehensive university in Iran using the multi-level frontier analysis [25]. Tran, Thien Vu et al. calculated the efficiency of 172 higher education institutions in Vietnam during the inclusive period from 2012 to 2016 using the data envelopment analysis method. They examined the competitiveness level of higher education institutions from aspects such as disciplinary distribution, autonomy, and internationalization [26]. However, higher education efficiency mostly presents the level of competitiveness from the perspectives of input and output, without providing a comprehensive depiction of the development status of the higher education system from a sustainable development perspective.

In summary, previous studies have overlooked the analysis of higher education competitiveness from a sustainable development theory perspective. The higher education system is a comprehensive and complex system composed of multiple factors. This study utilizes sustainable development theory and competitiveness theory to transform the intricate operational mechanisms of the system into simpler descriptions.

### 2.3. *DPSIR Model*

The Driving-force—Pressure—State—Impact—Response (DPSIR) framework model is an evaluation model proposed by the European Environment Agency (EEA) in 1993. It organizes relevant indicators based on causal relationships and has been widely used in environmental system assessments, gradually becoming an effective tool for assessing the state of environmental systems and causal relationships regarding environmental issues [27]. This model evolved from a combination of the Pressure—State—Response (PSR) model and the Driving—State—Response (DSR) model, incorporating their respective advantages [28].

The DPSIR model enables a more comprehensive and systematic analysis and evaluation of the continuous feedback mechanisms between indicators. Existing research has predominantly focused on the application of the DPSIR model in environmental assessments [29], resource management [30], and other related areas. In the DPSIR model, concerning environmental issues, the driving forces (D) primarily consist of economic and social development, as well as population growth, which exert a series of negative pressures (P) on the ecological environment. These pressures lead to the deterioration of the ecological state (S), resulting in various adverse impact (I) on human society. In response, corresponding measures (R) are taken to improve the current ecological environment, seeking harmonious development between humans and nature. Despite being an important theoretical framework widely used in environmental governance [31-32], there has been limited research applying the DPSIR model to the selection of evaluation indicators for higher education competitiveness. Since the 1930s, scholars have been applying the principles of ecological sustainability from the field of ecology to the domain of education, introducing concepts such as "educational ecology" [33]. In recent years, with the development of higher education in China, many scholars have started examining the current state of higher education from a sustainable development perspective [34]. However, only a few studies have recognized the DPSIR model as an important guiding framework for exploring sustainable development initiatives [23], demonstrating the model's completeness and effectiveness [35]. In the field of higher education competitiveness research,

the DPSIR model also holds strong applicability. Firstly, the DPSIR model allows for a comprehensive construction of an evaluation indicator system for higher education competitiveness, incorporating the five subsystems of driving forces, pressures, state, impact, and response. This offers a new analytical framework for investigating the competitiveness of Chinese higher education. Secondly, the higher education system exhibits characteristics of complexity and dynamism. This study introduces the "Driving-force—Pressure—State—Impact—Response" framework, which not only reflects the multi-level nature of the evaluation elements of higher education competitiveness but also captures the cyclical nature of system dynamics.

### 3. Research Methods and Data Sources

#### 3.1. Research Methods

##### 3.1.1. The Entropy Weight TOPSIS Measurement Method

In this study, the entropy weight TOPSIS method was employed to measure the competitiveness level of higher education in China [36]. This method offers high precision and reliability. It not only effectively avoids the influence of subjective preferences on indicator weights but also overcomes the limitations of principal component analysis, such as susceptibility to outliers [37]. The specific steps are as follows:

Step 1: Standardize the indicators using the range method.

$$Z_{ij} = \begin{cases} \frac{X_{ij} - \min(X_{ij})}{\max(X_{ij}) - \min(X_{ij})}, & X_{ij} \text{ as a positive indicator} \\ \frac{\max(X_{ij}) - X_{ij}}{\max(X_{ij}) - \min(X_{ij})}, & X_{ij} \text{ as a negative indicator} \end{cases} \quad (1)$$

In the formula,  $X_{ij}$ ,  $Z_{ij}$  represents the  $j$ th original value of the higher education competitiveness indicator for the  $i$  province, and represents the standardized value after normalization.

Step 2: Calculate the information entropy  $E_j$  for each indicator  $Z_{ij}$  in the higher education competitiveness indicator system.

$$E_j = -\frac{1}{\ln n} \sum_{i=1}^n (A_{ij}) \ln(A_{ij}) \quad (2)$$

$$A_{ij} = Z_{ij} / \sum_{i=1}^n Z_{ij} \quad (3)$$

Step 3: Calculate the weights for each indicator.

$$W_j = \frac{1 - E_j}{\sum_{j=1}^m (1 - E_j)} \quad (4)$$

Step 4: Calculate the weighted index for each indicator of higher education competitiveness level.

$$R_{ij} = W_j \times Z_{ij} \quad (5)$$

Step 5: Calculate the distances  $D_i^+$  and  $D_i^-$  between each measured object and the best object  $S_j^+$  and worst object  $S_j^-$ , respectively.

$$D_i^+ = \sqrt{\sum_{j=1}^m (S_j^+ - R_{ij})^2} \quad (6)$$

$$D_i^- = \sqrt{\sum_{j=1}^m (S_j^- - R_{ij})^2} \quad (7)$$

In the formula,  $S_j^+ = \max(R_{i1}, R_{i2}, \dots, R_{im})$ ,  $S_j^- = \min(R_{i1}, R_{i2}, \dots, R_{im})$

Step 6: Calculate the relative closeness degree  $C_i$  between each measured object and the ideal object.

$$C_i = \frac{D_i^-}{D_i^+ + D_i^-} \quad (8)$$

The relative closeness degree  $C_i$ , as represented in the formula, ranges between 0 and 1. A higher value of  $C_i$  indicates a higher level of competitiveness in higher education for province  $i$ . Conversely, a lower value of  $C_i$  indicates a lower level of competitiveness in higher education for province  $i$ .

### 3.1.2. Kernel Density Estimation

#### (1) Traditional Kernel Density Estimation

Traditional Kernel Density Estimation is a non-parametric method used primarily to study the unevenness of spatial distributions. This method uses a continuous density curve to describe the distribution pattern of a random variable, thereby reflecting information about the location, shape, and other characteristics of the variable's distribution [38]. Kernel density functions can take various forms, such as triangular kernel functions, rectangular kernel functions, Gaussian kernel functions, and Epanechnikov kernel functions. In this study, we selected the Gaussian kernel density function to analyze the dynamic evolution of the distribution of higher education competitiveness. The calculation formula is as follows:

$$f(x) = \frac{1}{Nh} \sum_{i=1}^N K\left(\frac{x_i - \bar{x}}{h}\right) \quad (9)$$

$$K(x) = \frac{1}{\sqrt{2\pi}} \exp\left(-\frac{x^2}{2}\right) \quad (10)$$

In the formula,  $f(x)$  represents the density function of the random variable  $x$ ;  $N$  represents the number of observations;  $x_i$  represents the independently and identically distributed observations;  $\bar{x}$  represents the mean of the observations;  $h$  represents the bandwidth; and  $K(x)$  represents the Gaussian kernel density.

#### (2) Spatial Kernel Density Estimation

The spatial Kernel Density Estimation method incorporates spatial factors into the traditional Kernel Density Estimation, allowing for the estimation of the probability density function of a random variable undergoing spatial transformations during a given period of time. By analyzing dynamic distribution maps, it accurately captures the patterns of change and helps explain the long-term migration trends of provinces [39]. In this study, the Gaussian kernel density function is still selected for computation in the spatial estimation. The formula for calculation is as follows:

$$g(y|x) = \frac{f(x, y)}{f_1(x)} \quad (11)$$

$$f(x, y) = \frac{1}{Nh_x h_y} \sum_{i=1}^N K_x\left(\frac{X_i - \bar{x}}{h_x}\right) K_y\left(\frac{Y_i - \bar{y}}{h_y}\right) \quad (12)$$

In the formula,  $g(y|x)$  represents the distribution status of the random variable  $y$  conditional on the random variable  $x$ .  $f_1(x)$  represents the marginal kernel density function of  $x$ .  $f(x, y)$  represents the joint kernel density function of  $x$  and  $y$ .

### 3.1.3. Markov Chain Analysis Method

The Markov chain analysis method is a special stochastic process with discrete time and state. It involves discretizing the data into  $n$  types and calculating the corresponding changes and probability distributions over time to approximate the entire process of evolution [40]. The Markov chain method is primarily used to describe the probabilities of transitioning from one state to another for the subject of study. By analyzing the probability transition matrix, the dynamic evolution process of the subject can be studied. In this study, the Markov chain method is employed to analyze the dynamic evolution process of higher education competitiveness. The basic model setup is as follows:

$$\begin{aligned} P &= P\{X_{t+1} = b | X_t = a, X_{t-1} = a_{t-1}, X_{t-2} = a_{t-2}, \dots, X_0 = a_0\} \\ &= P\{X_{t+1} = b | X_t = a\} \end{aligned} \quad (13)$$

In the formula, the sequence  $\{X_t\}$  represents the Markov chain, and  $X_t$  denotes that the state in period  $t+1$  is only dependent on the state in period  $t$ .

In this study, higher education competitiveness is divided into  $n$  state. Through the Markov chain model, the probability  $p_{ab}$  is calculated to transition the measured higher education competitiveness level from state  $a$  in period  $t$  to state  $b$  in period  $t+1$ . The calculation formula is as follows:

$$p_{ab} = \frac{n_{ij}}{n_i} \quad (14)$$

In the formula,  $n_{ij}$  represents the number of provinces transitioning from state  $a$  at time period  $t$  to state  $b$  at time period  $t+1$ ;  $n_i$  represents the total number of provinces in state  $a$  at time period  $t$ .  $p_{ab}$  forms an  $n \times n$  dimensional Markov chain transition probability matrix, where the elements on the diagonal represent the probability of the higher education competitiveness level remaining stable in the current state. The larger the probability, the less fluid the mobility of higher education competitiveness level. The elements off the diagonal represent the probability of transitioning between different state of higher education competitiveness level. The larger the probability, the less stable the higher education competitiveness level.

### 3.1.4. Dagum Gini Coefficient

Compared to traditional Gini coefficient and Theil index, the Dagum Gini coefficient not only handles the issue of cross-overlapping between sample data, but also characterizes regional disparities in Higher Education Competitiveness Level and decomposes the sources of overall regional disparities [41]. Therefore, this study employs the Dagum Gini coefficient to analyze regional disparities in Higher Education Competitiveness Level and their sources [42]. The Dagum Gini coefficient and its decomposition formula are as follows:

First, calculate the overall Gini coefficient for all provinces.

$$G = \frac{\sum_{j=1}^k \sum_{h=1}^k \sum_{i=1}^{Q_j} \sum_{r=1}^{Q_h} |T_{ji} - T_{hr}|}{2Q^2 \bar{T}} \quad (15)$$

In the formula,  $j$  and  $h$  represent different regions,  $i$  and  $r$  represent different provinces,  $Q$  represents the total number of provinces,  $k$  also represents the total number of provinces,  $Q_j(Q_h)$  represents the number of provinces within region  $j(h)$ ,  $T_{ji}(T_{hr})$  represents the higher education competitiveness level of province  $i(r)$  within region  $j(h)$ , and  $\bar{T}$  represents the average higher education competitiveness level of all provinces.

Secondly, decompose the Gini coefficient  $G$  into within-region disparity  $G_w$ , between-region disparity  $G_{nb}$ , and supervariation density  $G_t$  using subgroup decomposition method.



$$G_{jj} = \frac{\sum_{i=1}^{Q_j} \sum_{r=1}^{Q_j} |T_{ji} - T_{hr}|}{2Q_j \bar{T}_j} \quad (16)$$

$$G_{jh} = \sum_{i=1}^{Q_j} \sum_{r=1}^{Q_h} \frac{|T_{ji} - T_{hr}|}{Q_j Q_h (\bar{T}_j + \bar{T}_h)} \quad (17)$$

In the formula,  $G_{jj}$  represents the Gini coefficient within region  $j$ ,  $G_{jh}$  represents the Gini coefficient between region  $j$  and region  $h$ .

$$G_w = \sum_{j=1}^k G_{jj} U_j V_j \quad (18)$$

$$G_{nb} = \sum_{j=2}^k \sum_{h=1}^{j-1} G_{jh} (U_j V_h + U_h V_j) D_{jh} \quad (19)$$

$$G_t = \sum_{j=2}^k \sum_{h=1}^{j-1} G_{jh} (U_j V_h + U_h V_j) (1 - D_{jh}) \quad (20)$$

In the formula,  $U_j = Q_j / Q$ ,  $V_j = Q_j \bar{T}_j / QT$ ;  $D_{jh}$  represents the mutual influence of Higher Education Competitiveness Level between region  $j$  and region  $h$ . The calculation formula is as follows:

$$D_{jh} = \frac{d_{jh} - U_{jh}}{d_{jh} + U_{jh}} \quad (21)$$

$$d_{jh} = \int_0^\infty dF_j(y) \int_0^y (y-x) dF_h(x) \quad (22)$$

$$U_{jh} = \int_0^\infty dF_h(y) \int_0^y (y-x) dF_j(x) \quad (23)$$

In the formula,  $d_{jh}$  represents the difference in Higher Education Competitiveness Level between region  $j$  and region  $h$ .  $F_j(F_h)$  represents the cumulative distribution function of Higher Education Competitiveness Level in region  $j(h)$ .

### 3.2. Construction of Evaluation Indicator System

The selection of indicators follows principles such as comprehensiveness, scientific rigor, representativeness, and operational feasibility. This process involves three stages: text analysis, theoretical construction, and expert consultation.

Phase one, the text analysis stage. Collecting relevant policy documents and literature related to the development of higher education in China, analyzing them to identify theoretical models and relevant indicators associated with higher education competitiveness. For example, the document "Overall Plan for the Construction of World-Class Universities and First-Class Disciplines" emphasizes the role of high-level talents and proposes the indicator "Proportion of Full-Time Faculty Members with Doctoral Degrees." The "Proposals of the Central Committee of the Communist Party of China on Formulating the Fourteenth Five-Year Plan for National Economic and Social Development and the Long-Range Goals for 2035" clearly outlines the policy orientation and key requirements for "Building a High-Quality Education System." It highlights the deepening of industry-education integration, enhancing the contribution of universities to industrial transformation and upgrading, and transforming major scientific innovations and breakthroughs into advanced productive forces. It also includes indicators such as "Number of Scientific Papers Published, Number of Papers Published Abroad, Number of Papers Indexed in the Top Three International Databases, Number of University Patent Ownership Transfers and Licenses, and Income from University Patent Ownership Transfers and Licenses," which represent the research quality of universities.

Phase two, the theoretical construction stage. Based on the fundamental theoretical viewpoints of the DPSIR model and the operational characteristics of the higher education development environment, and combining the basic connotations of the five aspects of

indicators in the model: driving force, pressures, state, impact, and response, the characteristics represented by the indicators identified in the previous stage of text analysis are incorporated into these five aspects of indicators. At the same time, some indicators that are less relevant to the study or have conflicting content are excluded. For example, "Proportion of Employment Rates between Non-full-time and Full-time Education" and "Average Number of Higher Education Students per 100,000 Population" may be included or excluded based on their relevance and consistency with the research context.

Phase three, the expert consultation stage. Interviews are conducted with 7 university teaching administrators and 5 university faculty members holding the rank of associate professor or higher. The indicator system, which was preliminarily screened in the previous stage, is further refined based on the input from the experts. Adjustments are made to the indicators according to the experts' recommendations. Higher education competitiveness is a complex system influenced by multiple factors. In this study, based on the DPSIR framework, the indicators are ultimately confirmed from the perspectives of driving force, pressures, state, impact, and response [43].

First, driving force (D). "Driving force" is the propelling factor behind the development of the higher education system and the main factor that contributes to the improvement of higher education competitiveness. The main factors that drive changes in higher education competitiveness are economic drivers, funding inputs, and infrastructure investments. The rapid development of the socio-economic landscape has led to changes in the demand for higher education by the general population, which in turn drives the continuous enhancement and improvement of higher education competitiveness. It has a long-term potential impact on the development of higher education in an indirect manner. Funding inputs and infrastructure investments are direct driving force for the sustainable development of higher education and important guarantees for high-quality development.

Second, pressure (P). "Pressure" refers to the direct demand placed on the sustainable development of higher education in the context of building an educationally strong nation. Higher education faces various pressures during its operation and development, primarily in terms of educational equity and the contribution of higher education to social development. If these pressure are not adequately addressed and adjusted during the process of enhancing and developing higher education competitiveness, they can pose obstacles and have negative impact on the sustainable development of higher education.

Third, state (S). "State" refers to the current development status of higher education competitiveness under the dual influence of driving force and pressure. It serves as the starting point for the study of "impact" and "response". The state are presented through two aspects: student enrollment scale and faculty size. These aspects form the foundation of higher education competitiveness.

Fourth, impact (I). "Impact" refers to the effects generated by the changes in higher education competitiveness. It represents the ultimate outcomes and effects resulting from the combined influence of "driving force", "pressure", and "state". The improvement of higher education competitiveness primarily has significant impact on teaching quality and research quality. These aspects play a crucial role in enhancing the overall competitiveness of higher education.

Fifth, response (R). "Response" refers to the feedback and regulatory condition within the higher education system. In order to achieve sustainable development of higher education and effectively manage the pressures arising from the enhancement of higher education competitiveness, continuous adjustments must be made to the operation of the higher education system. The capacity for such adjustments is also an important manifestation of higher education competitiveness. Therefore, "response" is reflected through indicators related to response measures and system feedback, which provide insights into the feedback and regulatory conditions within the higher education system.

Based on the above analysis, this study selects 37 fundamental indicators from the perspectives of "driving force", "pressure", "state", "impact", and "response" to construct a

measurement index system for assessing the competitiveness of higher education in China. The table below (Table 1) presents the constructed index system.

### 3.3. Data Sources

The research scope of this study includes 31 provinces (autonomous regions and municipalities) in China from 2008 to 2020. Due to severe data deficiencies in the Hong Kong, Macao, and Taiwan regions, they were not included in the study. The primary data sources for this study are the annual publications such as "China Statistical Yearbook," "China Science and Technology Statistical Yearbook," "China Urban Statistical Yearbook," and "China Population and Employment Statistics Yearbook." The data were also collected from the official website of the Ministry of Education of China (<http://www.moe.gov.cn/>). For missing data in certain years or provinces, linear interpolation was employed to fill the gaps. Furthermore, considering the influence of price factors, indicators such as per capita GDP and per capita disposable income that involve price factors were adjusted using a constant price based on 2008.

**Table 1.** Measurement Indicator System for Competitiveness of Higher Education in China

| Goal Level                                | Criterion Level | Factor Level                       | Indicator Level                                                                                                         | Unit                     |
|-------------------------------------------|-----------------|------------------------------------|-------------------------------------------------------------------------------------------------------------------------|--------------------------|
| Competitiveness of Higher Education Level | driving force   | Economic driving force             | per capita GDP                                                                                                          | Per person / Per capita  |
|                                           |                 |                                    | per capita disposable income.                                                                                           | Per person / Per capita  |
|                                           |                 | Financial investment               | government funding for higher education                                                                                 | Ten thousand yuan        |
|                                           |                 |                                    | expenditure on higher education                                                                                         | One thousand yuan        |
|                                           |                 |                                    | expenditure on research and development (R&D) in higher education institutions                                          | Ten thousand yuan        |
|                                           |                 | Infrastructure investment          | fixed capital value                                                                                                     | One hundred million yuan |
|                                           |                 |                                    | school building area                                                                                                    | Square meter             |
|                                           |                 |                                    | number of print and electronic books                                                                                    | Ten thousand copies      |
|                                           |                 |                                    | scientific research instruments and equipment assets                                                                    | Ten thousand yuan        |
|                                           | pressure        | Educational equity                 | Average expenditure on higher education per student.                                                                    | yuan                     |
|                                           |                 |                                    | number of people pursuing higher education                                                                              | person                   |
|                                           |                 | Contribution to social development | The proportion of employed individuals with undergraduate education among the total employed population in the province | %                        |
|                                           |                 |                                    | The proportion of employed individuals with graduate education among the total employed population in the province      | %                        |
|                                           |                 |                                    | labor productivity                                                                                                      | %                        |
|                                           | state           | Enrollment size                    | The number of undergraduate students and junior college students in higher education institutions                       | person                   |
|                                           |                 |                                    | The number of graduate students in higher education institutions                                                        | person                   |

|  |          |                             |                                                                                                   |                     |
|--|----------|-----------------------------|---------------------------------------------------------------------------------------------------|---------------------|
|  |          |                             | The number of doctoral students in higher education institutions                                  | person              |
|  |          | Faculty size                | The number of full-time teachers                                                                  | Ten thousand people |
|  |          |                             | student-to-faculty ratio in regular higher education institutions                                 | %                   |
|  |          |                             | The proportion of associate senior and above full-time teachers                                   | %                   |
|  |          |                             | The proportion of full-time teachers with doctoral degrees                                        | %                   |
|  |          |                             | The number of ordinary higher education institutions                                              | count               |
|  | impact   | Education quality           | The number of undergraduate degrees awarded                                                       | person              |
|  |          |                             | The proportion of the population that receives higher education                                   | %                   |
|  |          | scientific research quality | The number of scientific papers published.                                                        | piece               |
|  |          |                             | The number of research papers published abroad                                                    | piece               |
|  |          |                             | The number of scientific publications                                                             | type                |
|  |          |                             | The number of patent applications                                                                 | item                |
|  |          |                             | The number of scientific papers indexed in the top three international citation databases         | piece               |
|  |          |                             | The number of patent transfers and licenses in higher education institutions                      | item                |
|  |          |                             | The revenue from the transfer and licensing of patent ownership in higher education institutions. | Ten thousand yuan   |
|  |          |                             | The number of national or industrial standards                                                    | item                |
|  | response | Response measures           | The growth rate of per-student expenditure on higher education.                                   | %                   |
|  |          |                             | The growth rate of per-student expenditure on the operation of higher education institutions.     | %                   |
|  |          | System feedback             | The number of newly added teachers compared to the previous year                                  | ten thousand person |

#### 4. The spatial pattern and dynamic evolution trend of China's higher education competitiveness level

This study aims to measure the level of competitiveness in China's higher education from 2008 to 2020. By doing so, it not only captures the horizontal variations in higher education competitiveness among different provinces but also provides a clear representation of the dynamic comparability of evaluation results.

##### 4.1. Spatial Pattern of China's Higher Education Competitiveness Level

###### 4.1.1. Temporal Characteristics of the Competitiveness Level of Chinese Higher Education

From a national perspective, there were a total of 1,940 regular higher education institutions in China in 2008, and this number increased to 2,738 in 2020, representing a growth rate of 41%. According to the results reported in Table 3, the competitiveness level of Chinese

higher education showed a steady upward trend from 2008 to 2020. The mean value of the competitiveness level of Chinese higher education increased steadily from 0.282 in 2008 to 0.335 in 2020, with an overall increase of 18.79%. Among them, there were 14 regions in 2008, 2014, and 2018 where the competitiveness level of higher education was higher than the mean value. In 2010, 2012, and 2020, there were 12 regions with higher competitiveness level than the mean value, and in 2016, there were 13 such regions. The regions with competitiveness level higher than the mean value accounted for only about 45% of the total number of provinces studied, indicating that more than half of the regions had a lower competitiveness level in higher education than the national average. This reflects that the overall competitiveness level of higher education in China is still relatively low, and there is still a considerable room for improvement. In addition, in 2008, the regions ranking high in terms of competitiveness were Beijing, Jiangsu, Guangdong, Shanghai, and Hubei. By 2014, the regions ranking high were Beijing, Jiangsu, Guangdong, Shanghai, and Shandong, as the development of higher education in China progressed. In 2020, the top five regions in terms of ranking were Guangdong, Beijing, Jiangsu, Shandong, and Zhejiang. Throughout the observed period, there were regions such as Tibet, Qinghai, Ningxia, Hainan, and Xinjiang that consistently ranked lower in terms of higher education level. There was a significant disparity in the competitiveness level of higher education between the regions ranking high and those ranking low. Therefore, it can be seen that the eastern regions have a stronger competitive edge and better momentum in the development of higher education, while the western regions have relatively weak development and lack competitiveness.

**Table 2.** Competitiveness Level and Ranking of Higher Education in Chinese Provinces

| Region         | 2008  | Rank | 2010  | Rank | 2012  | Rank | 2014  | Rank | 2016  | Rank | 2018  | Rank | 2020  | Rank |
|----------------|-------|------|-------|------|-------|------|-------|------|-------|------|-------|------|-------|------|
| Beijing        | 0.955 | 1    | 0.954 | 1    | 0.504 | 2    | 0.862 | 1    | 0.631 | 4    | 0.815 | 1    | 0.813 | 2    |
| Tianjin        | 0.189 | 20   | 0.212 | 18   | 0.135 | 17   | 0.223 | 19   | 0.247 | 21   | 0.253 | 19   | 0.207 | 20   |
| Hebei          | 0.282 | 12   | 0.257 | 14   | 0.173 | 13   | 0.324 | 13   | 0.401 | 13   | 0.315 | 14   | 0.367 | 12   |
| Shanxi         | 0.110 | 23   | 0.126 | 23   | 0.085 | 22   | 0.197 | 22   | 0.207 | 24   | 0.186 | 23   | 0.172 | 24   |
| Inner Mongolia | 0.088 | 25   | 0.121 | 24   | 0.066 | 24   | 0.148 | 24   | 0.184 | 27   | 0.138 | 26   | 0.134 | 27   |
| Liaoning       | 0.384 | 9    | 0.355 | 10   | 0.203 | 10   | 0.360 | 11   | 0.403 | 12   | 0.326 | 13   | 0.328 | 14   |
| Jilin          | 0.194 | 19   | 0.201 | 20   | 0.115 | 21   | 0.210 | 20   | 0.259 | 19   | 0.257 | 18   | 0.186 | 22   |
| Heilongjiang   | 0.276 | 14   | 0.265 | 13   | 0.142 | 15   | 0.281 | 15   | 0.333 | 16   | 0.258 | 17   | 0.245 | 18   |
| Shanghai       | 0.497 | 4    | 0.550 | 4    | 0.301 | 4    | 0.552 | 4    | 0.405 | 11   | 0.526 | 5    | 0.529 | 6    |
| Jiangsu        | 0.816 | 2    | 0.760 | 2    | 0.385 | 3    | 0.690 | 2    | 0.800 | 1    | 0.721 | 3    | 0.765 | 3    |
| Zhejiang       | 0.448 | 7    | 0.483 | 5    | 0.221 | 9    | 0.463 | 8    | 0.449 | 8    | 0.478 | 8    | 0.531 | 5    |
| Anhui          | 0.200 | 18   | 0.229 | 15   | 0.149 | 14   | 0.311 | 14   | 0.383 | 14   | 0.329 | 12   | 0.333 | 13   |
| Fujian         | 0.245 | 15   | 0.228 | 16   | 0.125 | 18   | 0.247 | 18   | 0.287 | 18   | 0.283 | 15   | 0.269 | 17   |
| Jiangxi        | 0.216 | 16   | 0.207 | 19   | 0.138 | 16   | 0.272 | 16   | 0.342 | 15   | 0.270 | 16   | 0.282 | 15   |
| Shandong       | 0.459 | 6    | 0.456 | 7    | 0.263 | 6    | 0.526 | 5    | 0.673 | 3    | 0.532 | 4    | 0.625 | 4    |
| Henan          | 0.281 | 13   | 0.308 | 11   | 0.195 | 11   | 0.473 | 7    | 0.554 | 6    | 0.479 | 7    | 0.501 | 9    |
| Hubei          | 0.486 | 5    | 0.464 | 6    | 0.289 | 5    | 0.500 | 6    | 0.562 | 5    | 0.494 | 6    | 0.513 | 7    |
| Hunan          | 0.359 | 11   | 0.286 | 12   | 0.188 | 12   | 0.353 | 12   | 0.423 | 9    | 0.348 | 11   | 0.371 | 11   |
| Guangdong      | 0.737 | 3    | 0.652 | 3    | 0.990 | 1    | 0.609 | 3    | 0.736 | 2    | 0.763 | 2    | 0.912 | 1    |
| Guangxi        | 0.132 | 21   | 0.136 | 22   | 0.084 | 23   | 0.202 | 21   | 0.252 | 20   | 0.246 | 20   | 0.281 | 16   |
| Hainan         | 0.021 | 28   | 0.042 | 28   | 0.019 | 28   | 0.040 | 28   | 0.057 | 28   | 0.055 | 28   | 0.055 | 28   |

|            |       |    |       |    |       |    |       |    |       |    |       |    |       |    |
|------------|-------|----|-------|----|-------|----|-------|----|-------|----|-------|----|-------|----|
| Chongqing  | 0.203 | 17 | 0.213 | 17 | 0.122 | 19 | 0.255 | 17 | 0.298 | 17 | 0.238 | 21 | 0.241 | 19 |
| Sichuan    | 0.399 | 8  | 0.433 | 8  | 0.230 | 7  | 0.441 | 9  | 0.547 | 7  | 0.445 | 9  | 0.505 | 8  |
| Guizhou    | 0.062 | 27 | 0.080 | 27 | 0.046 | 26 | 0.140 | 25 | 0.221 | 22 | 0.216 | 22 | 0.185 | 23 |
| Yunnan     | 0.119 | 22 | 0.148 | 21 | 0.116 | 20 | 0.175 | 23 | 0.217 | 23 | 0.176 | 24 | 0.202 | 21 |
| Tibet      | 0.010 | 31 | 0.019 | 31 | 0.028 | 31 | 0.022 | 31 | 0.054 | 31 | 0.059 | 31 | 0.047 | 31 |
| Shanxi     | 0.384 | 10 | 0.382 | 9  | 0.225 | 8  | 0.419 | 10 | 0.410 | 10 | 0.418 | 10 | 0.466 | 10 |
| Gansu      | 0.093 | 24 | 0.097 | 26 | 0.061 | 25 | 0.131 | 26 | 0.184 | 26 | 0.145 | 25 | 0.147 | 25 |
| Qinghai    | 0.002 | 30 | 0.005 | 30 | 0.003 | 30 | 0.009 | 30 | 0.012 | 30 | 0.016 | 30 | 0.009 | 30 |
| Ningxia    | 0.015 | 29 | 0.018 | 29 | 0.015 | 29 | 0.025 | 29 | 0.046 | 29 | 0.021 | 29 | 0.019 | 29 |
| Xinjiang   | 0.076 | 26 | 0.099 | 25 | 0.045 | 27 | 0.109 | 27 | 0.199 | 25 | 0.108 | 27 | 0.140 | 26 |
| Mean value | 0.282 |    | 0.283 |    | 0.183 |    | 0.309 |    | 0.348 |    | 0.320 |    | 0.335 |    |

**Note:** Due to space limitations, the measurement results for the following year are reported here.

#### 4.1.2. Spatial Characteristics of China's Higher Education Competitiveness Level

In order to provide a more intuitive display of the development trend of China's higher education competitiveness from 2008 to 2020, this article divides the 31 provinces (autonomous regions and municipalities directly under the Central Government) into eastern, central, and western regions according to the classification method of the National Bureau of Statistics. The average measurement results of higher education competitiveness in the three regions and the country as a whole are shown in Figure 1. As can be seen from Figure 1, the Higher Education Competitiveness Level in the country and the three regions have significantly increased from 2008 to 2020. Specifically, the higher education competitiveness level in the eastern region is far higher than the national average, the higher education competitiveness level in the central region is on par with the national average, and the higher education competitiveness level in the western region is far lower than the national average, only about half of the national average. Moreover, the growth rate of Higher Education Competitiveness Level in the three regions is quite similar, showing a coordinated improvement trend.

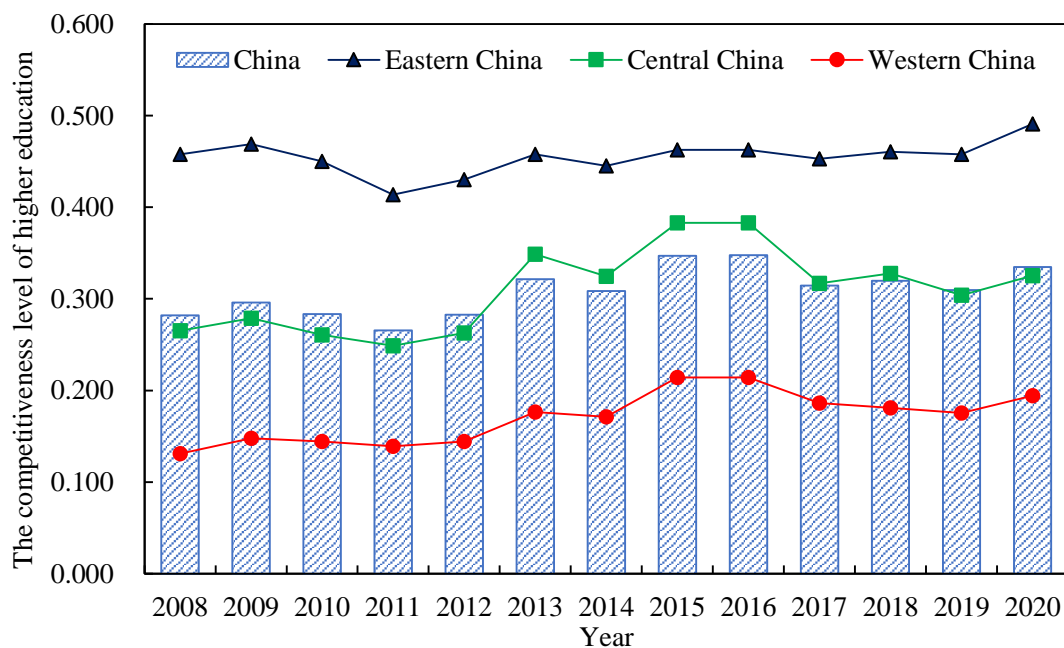

**Figure 1.** Average Higher Education Competitiveness Level and Their Trends in the Country and the Three Major Regions

This study selects four time points, namely 2008, 2012, 2016, and 2020, and classifies the Higher Education Competitiveness Level of each year into five grades: low level (0.002-0.1222), lower-middle level (0.123-0.263), middle level (0.264-0.423), upper-middle level (0.424-0.631), and high level (0.632-0.990). Using ArcGIS 10.8 software, the spatial distribution of Higher Education Competitiveness Level in various regions of China in 2008, 2012, 2016, and 2020 is plotted, as shown in Figure 2.

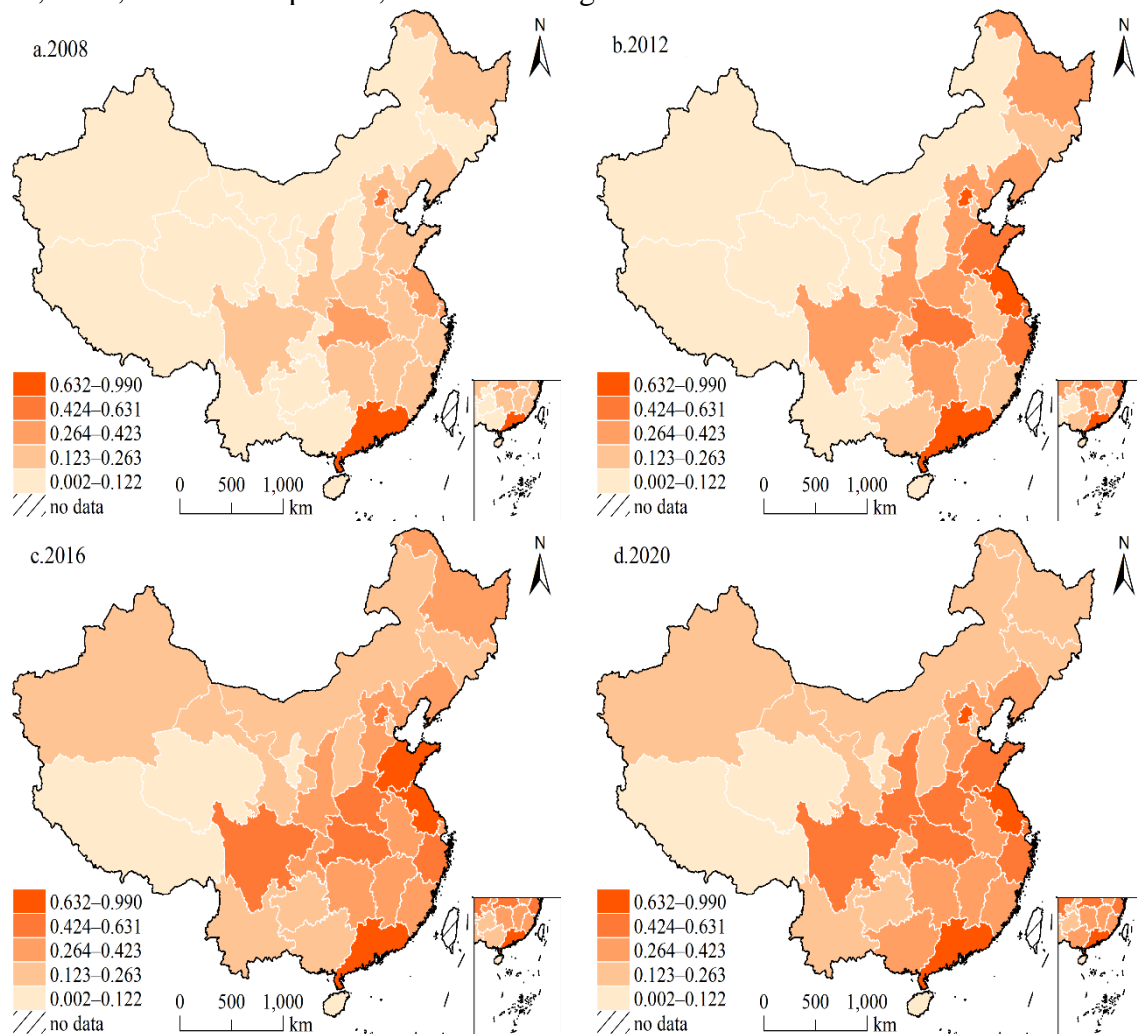

Review Number: GS (2019) 1822

**Figure 2.** Spatial and temporal Pattern of China's Higher Education Competitiveness Level from 2008 to 2020

As can be seen from Figure 2, with the passage of time, the overall level of higher education competitiveness has generally increased. Initially, high-level higher education competitiveness was scattered in areas such as Beijing, Jiangsu, Guangdong, Shanghai, and Hubei. Later, it concentrated in the eastern coastal areas, with Guangdong, Jiangsu, and Zhejiang becoming the leaders. These areas experienced rapid economic development and abundant job opportunities, resulting in a siphoning effect in the eastern region, attracting a large amount of social resources, promoting the development of higher education in the eastern region, and pushing forward its high-quality development process. Areas with low-level higher education competitiveness were mostly located in remote central and western regions, which were greatly affected by non-man made factors such as economic development, natural environment, and climate. The development of higher education was relatively slow, and the gap with the

developed provinces in the eastern region continued to widen, with no leapfrogging improvement and development achieved among neighboring provinces.

From the perspective of spatial evolution characteristics, there are differences in the level of higher education competitiveness across the country, with most high-level areas concentrated in the eastern coastal regions. The overall pattern shows a gradient differentiation trend of high in the east, low in the west, high in the south, and low in the north. The evolution characteristics over time indicate that the long-term evolution of Higher Education Competitiveness Level in various provinces is based on the pattern, showing a significant path dependency, making it difficult to achieve leapfrogging improvement in the short term. With the passage of time, the spatial imbalance of China's higher education competitiveness level will continue to exist, the gap will continue to widen, making it more difficult to bridge the gap.

The country's development has followed a relatively good trend, but the regional development imbalance caused by factors such as resource endowment, location conditions, and national policies has not been effectively alleviated but has gradually expanded. Therefore, both high-level and low-level regions need to identify their weaknesses, focus on breakthroughs, and achieve more comprehensive coordinated development.

#### *4.2. Dynamic Evolution Trend of China's Higher Education Competitiveness Level*

##### *4.2.1. Unconditional Kernel Density Estimation of China's Higher Education Competitiveness Level*

First, unconditional Kernel density estimation is used to investigate the change trend of China's higher education competitiveness level from year  $t$  to  $t+3$ ; second, the static Kernel density estimation method under spatial conditions is used to reveal the spatial correlation relationship between the higher education competitiveness level of each province and that of its neighboring provinces during the same period; finally, considering the time span on the basis of spatial dynamic Kernel density estimation method, the impact of neighboring provinces' higher education competitiveness level in year  $t$  on the higher education competitiveness level of the province in  $t+3$  years is analyzed. In the Kernel density estimation under spatial conditions, this paper selects the binary adjacency matrix to investigate the spatial correlation between provinces. In the Kernel density graph, the X-axis and Y-axis represent the higher education competitiveness level, and the Z-axis represents the density of each point in the X-Y plane. In the density contour map, both the X-axis and Y-axis represent the higher education competitiveness level, and the density contour lines represent different density values. The closer the contour lines are to the center, the higher the density value, and the more densely packed the contour lines, indicating a larger density change and a steeper corresponding Kernel density graph shape.

##### *(1) Unconditional Kernel Density Estimation of China's Higher Education Competitiveness Level*

In Kernel density graphs and density contour maps, the positive  $45^\circ$  diagonal line is usually used as a marker for changes in the evolution trend of higher education competitiveness level. In unconditional Kernel density estimation, the X-axis represents the higher education competitiveness level of the province in year  $t$ , the Y-axis represents the higher education competitiveness level of the province in  $t+3$  years, and the Z-axis represents the probability density. If the probability mass tends to be near the positive  $45^\circ$  diagonal line, it indicates that the trend of higher education competitiveness level from  $t$  to  $t+3$  years is relatively stable; if the probability mass tends to be near the negative  $45^\circ$  diagonal line, it indicates a significant change in the higher education competitiveness level from  $t$  to  $t+3$  years; if the probability mass concentrates near a specific scale on the Y-axis and parallel to the X-axis, it indicates a converging trend of higher education competitiveness level. According to Figure 3, the unconditional Kernel density estimation probability of the competitiveness level of higher education in China is mainly distributed around the positive  $45^\circ$  diagonal line. This suggests that without considering spatial conditions, the competitiveness level of higher education in each province of China demonstrates strong continuity.



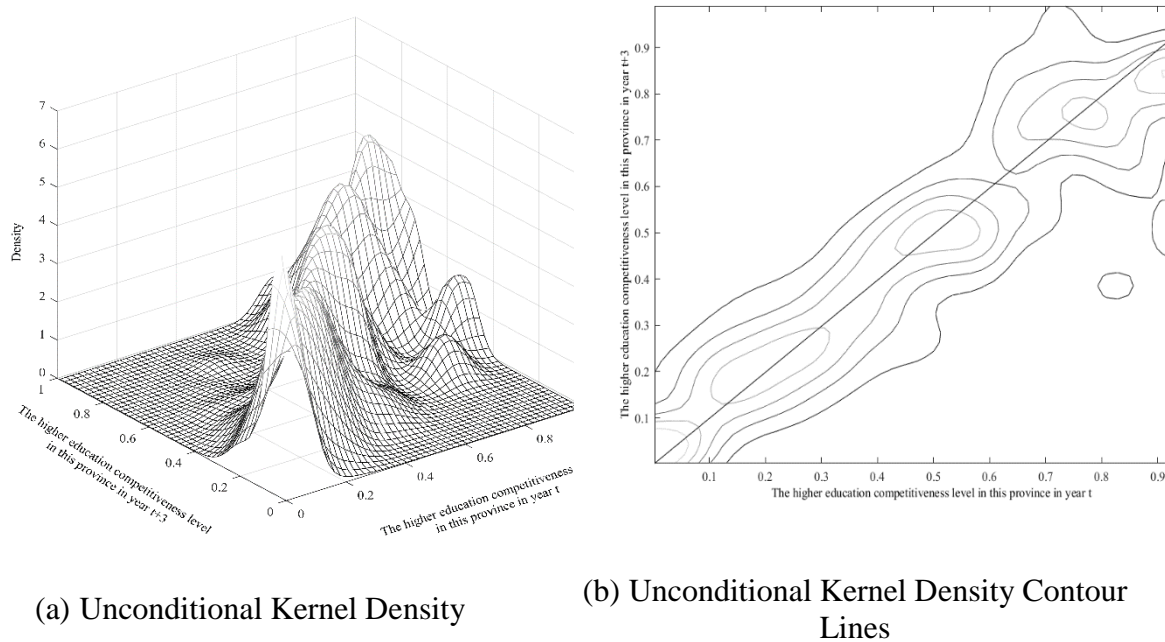

**Figure 3.** Unconditional Kernel Density Graph and Density Contour Lines of China's Higher Education Competitiveness Level

In addition, there are four peaks in the probability mass, which are distributed near the X-axis at 0.2, 0.5, 0.7, and 0.9. The peak near 0.9 is slightly lower than the 45° diagonal line, indicating that under unconditional assumptions, provinces with a higher education competitiveness level above 0.9 tend to experience a decline in the growth rate of higher education competitiveness level after 3 years.

## (2) Spatial Static Kernel Density Estimation of China's Higher Education Competitiveness Level

Figure 4 reports the results of Kernel density estimation under spatial static conditions, that is, the evolution of the higher education competitiveness level of a province considering the impact of neighboring provinces' Higher Education Competitiveness Level. In Figure 4, the X-axis represents the higher education competitiveness level of neighboring provinces in year  $t$ , the Y-axis represents the higher education competitiveness level of the province in year  $t$ , and the Z-axis represents the probability density of  $Y$  under  $X$  condition. If China's higher education competitiveness level shows a provincial convergence trend, and there is a positive spatial correlation between neighboring provinces' Higher Education Competitiveness Level, that is, high-level provinces cluster with high-level provinces, and low-level provinces cluster with low-level provinces, then the probability mass will tend to be near the positive 45° diagonal line.

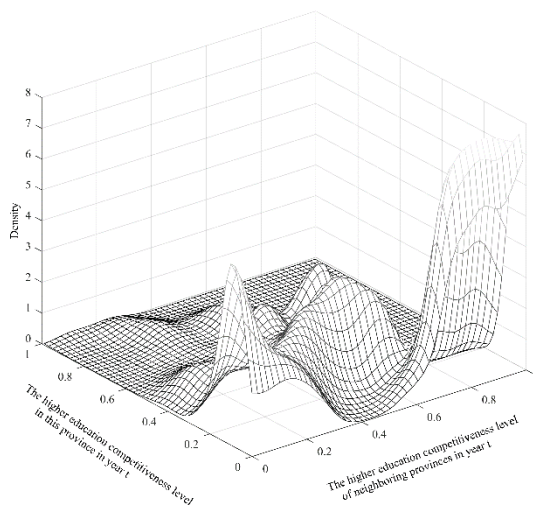

(a) Spatial Static Kernel Density

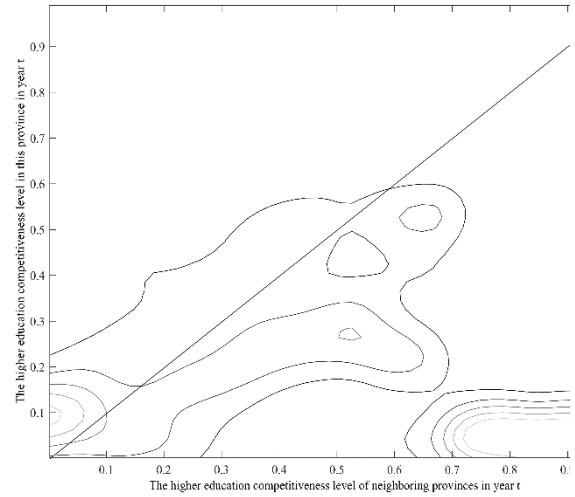

(b) Spatial Static Kernel Density Contour Lines

**Figure 4.** Kernel Density Map and Contour Lines of China's Higher Education Competitiveness Level under Spatial Static Conditions

According to Figure 4, the evolution trend of China's higher education competitiveness level under spatial static conditions exhibits a "discontinuity" phenomenon. Specifically, with 0.6 as the dividing line for the higher education competitiveness level of neighboring provinces, the evolution trends are quite different. When the higher education competitiveness level of neighboring provinces on the X-axis is below 0.1, the probability body is parallel to the X-axis, indicating that being adjacent to provinces with a level below 0.1 does not significantly improve the higher education competitiveness level of the province. When the higher education competitiveness level of neighboring provinces on the X-axis is between 0.1 and 0.6, the probability body tends to be close to the positive 45° diagonal line, indicating that spatial positive correlation is more significant at this time. The flow of educational resources, technology, and human capital between neighboring provinces contributes to the coordinated development and mutual improvement of Higher Education Competitiveness Level across provinces. When the higher education competitiveness level of neighboring provinces is above 0.6, the probability body significantly deviates downwards, concentrating at 0-0.2 on the Y-axis, indicating that being adjacent to high-level provinces does not significantly affect the improvement of the higher education competitiveness level of the province. When there is a significant gap between the Higher Education Competitiveness Level of neighboring provinces and the province, the flow of elements related to higher education tends to be more concentrated in the more developed provinces, causing a siphoning effect in neighboring provinces.

(3) Kernel Density Estimation of China's Higher Education Competitiveness Level under Spatial Dynamic Conditions

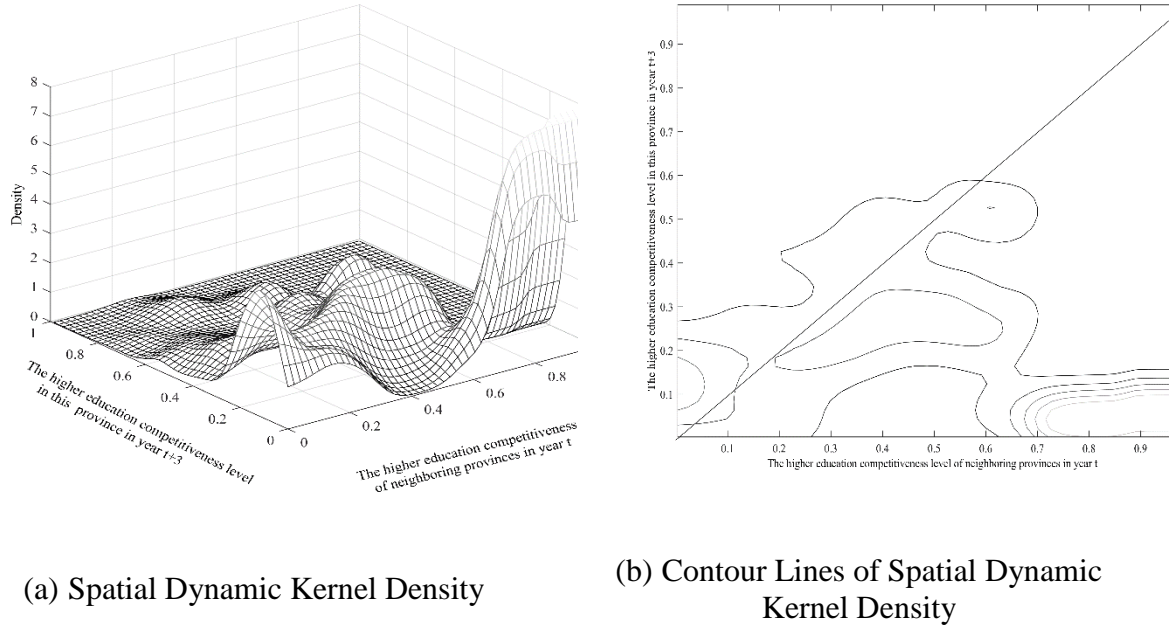

**Figure 5.** Kernel Density Map and Contour Lines of China's Higher Education Competitiveness Level under Spatial Dynamic Conditions

Figure 5 reports the Kernel density estimation results under spatial dynamic conditions, which considers both spatial factors and the time span, further examining the dynamic changes in the future development level of higher education competitiveness in a province due to its neighboring provinces in the current period. In Figure 5, the X-axis represents the higher education competitiveness level of neighboring provinces in year  $t$ , and the Y-axis represents the higher education competitiveness level of the province in year  $t+3$ . Compared with spatial static conditions, the overall probability body distribution under spatial dynamic conditions is similar but with some differences, indicating that the time factor can affect the interaction between provinces in the development of China's higher education competitiveness. Similar to Figure 4, Figure 5 also uses 0.6 as the dividing line for the higher education competitiveness level of neighboring provinces. When the higher education competitiveness level of neighboring provinces in year  $t$  is between 0 and 0.6, the probability body tends to be close to the positive 45° diagonal line, indicating that the higher education competitiveness level between provinces shows spatial positive correlation. Compared to Figure 4, the probability body distribution in the Y-axis direction in Figure 5 presents a more dispersed trend, indicating that the spatial correlation of Higher Education Competitiveness Level between provinces is weakened under the condition of considering time lag factors. When the higher education competitiveness level of neighboring provinces on the X-axis is above 0.6, the 3-year lag period does not show significant differences. Overall, for neighboring provinces with higher Higher Education Competitiveness Level, the time condition has not played a significant role in promoting the upward transfer of the province's higher education competitiveness level. However, for neighboring provinces with low and medium Higher Education Competitiveness Level, extending the time span can significantly reduce the spatial correlation effect between provinces.

#### 4.2.2. The Markov Chain Analysis method of China's Higher Education Competitiveness Level

This study uses the Markov chain analysis method to explore the direction and transition probability of Higher Education Competitiveness Level in different regions and further explain the dynamic evolution trend of China's higher education competitiveness level based on the Kernel density estimation analysis. This paper divides China's provinces' Higher Education

Competitiveness Level into four levels using the equal division method: low level within 25%, medium-low level between 26% and 50%, medium-high level between 51% and 75%, and high level above 75%. The Markov transition probability matrix of China's higher education competitiveness level state transition for 2008-2020 is then calculated with a time lag of 1 year, 2 years, 3 years, and 4 years, as shown in Table 3.

Table 3 shows that regardless of the time span, the probability values on the diagonal are higher than the probability values in other positions. Except for the medium-low level at  $t=t+4$ , the other diagonal probability values are greater than 0.5, indicating that when not considering the impact of spatial factors, the trend of Higher Education Competitiveness Level in various provinces of China is relatively stable, with low mobility but strong persistence. It is difficult for provinces at different levels to achieve level transitions. This result is consistent with the unconditional Kernel density estimation result. As the time span increases, the probability values on the diagonal decrease, and the convergence trend of Higher Education Competitiveness Level in various provinces weakens with the delay of time, and the stability gradually decreases. Secondly, the state transition of Higher Education Competitiveness Level in provinces usually occurs in adjacent level intervals. Under different time spans, the transition probabilities of each level are almost zero, indicating that the transition speed of Higher Education Competitiveness Level in various provinces is slow. As the time span increases, the probability of low-level to medium-high level transitions increases year by year, suggesting that provinces with lower Higher Education Competitiveness Level may achieve faster development in a certain period in the future, while other provinces may have difficulty achieving leapfrog development.

**Table 3.** Traditional Markov Transition Probability Matrix of Higher Education Competitiveness Level in China

| Time Span | Type | I     | II    | III   | IV    |
|-----------|------|-------|-------|-------|-------|
| t+1       | I    | 0.844 | 0.135 | 0.021 | 0.000 |
|           | II   | 0.097 | 0.720 | 0.140 | 0.043 |
|           | III  | 0.000 | 0.174 | 0.750 | 0.076 |
|           | IV   | 0.000 | 0.000 | 0.088 | 0.912 |
| t+2       | I    | 0.767 | 0.211 | 0.022 | 0.000 |
|           | II   | 0.133 | 0.627 | 0.205 | 0.036 |
|           | III  | 0.000 | 0.209 | 0.651 | 0.140 |
|           | IV   | 0.000 | 0.012 | 0.122 | 0.866 |
| t+3       | I    | 0.702 | 0.250 | 0.048 | 0.000 |
|           | II   | 0.130 | 0.584 | 0.247 | 0.039 |
|           | III  | 0.013 | 0.197 | 0.618 | 0.171 |
|           | IV   | 0.000 | 0.027 | 0.110 | 0.863 |
| t+4       | I    | 0.633 | 0.316 | 0.051 | 0.000 |
|           | II   | 0.134 | 0.478 | 0.343 | 0.045 |
|           | III  | 0.000 | 0.246 | 0.551 | 0.203 |
|           | IV   | 0.000 | 0.016 | 0.094 | 0.891 |

(2) Spatial Markov Chain Analysis of Higher Education Competitiveness Level in China

Table 4 presents the Markov transition probability matrix considering spatial lag terms. As shown in Table 4, regardless of the time span, the probability values on the diagonal are greater than those in other positions, indicating that under the conditions considering both time and space factors, the mobility trend of Higher Education Competitiveness Level in adjacent provinces is significantly enhanced.

When the higher education competitiveness of adjacent provinces is at medium-low and medium-high levels, the probability values on the diagonal are lower than those when the higher education competitiveness of adjacent provinces is at low and high levels. When the higher education competitiveness of adjacent provinces is at a medium level, the Higher Education Competitiveness Level of various provinces begin to show significant positive spatial correlation, which is consistent with the conclusions drawn from the Kernel density estimation analysis under spatial conditions mentioned earlier. Secondly, under various time spans, the probability values not directly adjacent to the diagonal values are also mostly zero or close to zero, indicating that with the extension of the time span, regardless of the level of higher education competitiveness of adjacent provinces, it is difficult for various provinces to achieve leapfrog development in higher education competitiveness.

**Table 4.** Spatial Markov Transition Probability Matrix of Higher Education Competitiveness Level in China

| t/t+1 | Type | I     | II    | III   | IV    | t/t+2 | Type | I     | II    | III   | IV    |
|-------|------|-------|-------|-------|-------|-------|------|-------|-------|-------|-------|
| I     | I    | 0.706 | 0.294 | 0.000 | 0.000 | I     | I    | 0.625 | 0.375 | 0.000 | 0.000 |
|       | II   | 0.167 | 0.333 | 0.167 | 0.333 |       | II   | 0.333 | 0.500 | 0.000 | 0.167 |
|       | III  | 0.000 | 0.333 | 0.333 | 0.333 |       | III  | 0.000 | 0.333 | 0.333 | 0.333 |
|       | IV   | 0.000 | 0.000 | 0.000 | 1.000 |       | IV   | 0.000 | 0.000 | 0.000 | 1.000 |
| II    | I    | 0.923 | 0.058 | 0.019 | 0.000 | II    | I    | 0.833 | 0.146 | 0.021 | 0.000 |
|       | II   | 0.125 | 0.667 | 0.125 | 0.083 |       | II   | 0.150 | 0.600 | 0.150 | 0.100 |
|       | III  | 0.000 | 0.192 | 0.692 | 0.115 |       | III  | 0.000 | 0.280 | 0.560 | 0.160 |
|       | IV   | 0.000 | 0.000 | 0.045 | 0.955 |       | IV   | 0.000 | 0.000 | 0.050 | 0.950 |
| III   | I    | 0.643 | 0.286 | 0.071 | 0.000 | III   | I    | 0.771 | 0.157 | 0.071 | 0.000 |
|       | II   | 0.091 | 0.741 | 0.168 | 0.000 |       | II   | 0.200 | 0.600 | 0.200 | 0.000 |
|       | III  | 0.000 | 0.136 | 0.718 | 0.145 |       | III  | 0.100 | 0.171 | 0.607 | 0.122 |
|       | IV   | 0.000 | 0.000 | 0.122 | 0.878 |       | IV   | 0.000 | 0.027 | 0.162 | 0.811 |
| IV    | I    | 0.923 | 0.077 | 0.000 | 0.000 | IV    | I    | 0.917 | 0.083 | 0.000 | 0.000 |
|       | II   | 0.053 | 0.684 | 0.263 | 0.000 |       | II   | 0.118 | 0.706 | 0.176 | 0.000 |
|       | III  | 0.000 | 0.211 | 0.737 | 0.053 |       | III  | 0.000 | 0.176 | 0.706 | 0.118 |
|       | IV   | 0.000 | 0.000 | 0.074 | 0.926 |       | IV   | 0.000 | 0.000 | 0.125 | 0.875 |
| t/t+3 | Type | I     | II    | III   | IV    | t/t+4 | Type | I     | II    | III   | IV    |
| I     | I    | 0.833 | 0.100 | 0.067 | 0.000 | I     | I    | 0.571 | 0.357 | 0.071 | 0.000 |
|       | II   | 0.333 | 0.500 | 0.000 | 0.167 |       | II   | 0.167 | 0.500 | 0.167 | 0.167 |
|       | III  | 0.000 | 0.167 | 0.666 | 0.167 |       | III  | 0.000 | 0.333 | 0.667 | 0.000 |
|       | IV   | 0.000 | 0.000 | 0.000 | 1.000 |       | IV   | 0.000 | 0.000 | 0.000 | 1.000 |
| II    | I    | 0.795 | 0.182 | 0.023 | 0.000 | II    | I    | 0.683 | 0.293 | 0.024 | 0.000 |
|       | II   | 0.056 | 0.667 | 0.167 | 0.111 |       | II   | 0.143 | 0.429 | 0.286 | 0.143 |
|       | III  | 0.000 | 0.273 | 0.545 | 0.182 |       | III  | 0.000 | 0.250 | 0.550 | 0.200 |
|       | IV   | 0.000 | 0.056 | 0.000 | 0.944 |       | IV   | 0.000 | 0.000 | 0.000 | 1.000 |
| III   | I    | 0.700 | 0.229 | 0.071 | 0.000 | III   | I    | 0.357 | 0.571 | 0.071 | 0.000 |
|       | II   | 0.167 | 0.583 | 0.250 | 0.000 |       | II   | 0.125 | 0.500 | 0.375 | 0.000 |
|       | III  | 0.000 | 0.211 | 0.658 | 0.132 |       | III  | 0.000 | 0.257 | 0.571 | 0.171 |
|       | IV   | 0.000 | 0.030 | 0.182 | 0.788 |       | IV   | 0.000 | 0.034 | 0.138 | 0.828 |

|    |     |       |       |       |       |    |     |       |       |       |       |
|----|-----|-------|-------|-------|-------|----|-----|-------|-------|-------|-------|
| IV | I   | 0.909 | 0.000 | 0.091 | 0.000 | IV | I   | 0.900 | 0.000 | 0.100 | 0.000 |
|    | II  | 0.059 | 0.706 | 0.235 | 0.000 |    | II  | 0.133 | 0.600 | 0.267 | 0.000 |
|    | III | 0.077 | 0.077 | 0.692 | 0.154 |    | III | 0.000 | 0.182 | 0.636 | 0.182 |
|    | IV  | 0.000 | 0.000 | 0.095 | 0.905 |    | IV  | 0.000 | 0.000 | 0.111 | 0.889 |

## 5. Analysis of Differences and Sources of Higher Education Competitiveness Level in China

To further analyze the regional differences in Higher Education Competitiveness Level across the country and the three major regions of East, Central, and West, this study uses the Dagum Gini coefficient and its subgroup decomposition method to analyze the regional differences and sources of Higher Education Competitiveness Level in China. The results are shown in Table 5.

### 5.1. Overall Difference Analysis of Higher Education Competitiveness Level in China

According to the results reported in Table 5, the overall difference in Higher Education Competitiveness Level in China shows a downward trend. The overall Gini coefficient of Higher Education Competitiveness Level in China decreased from 0.445 in 2008 to 0.378 in 2020, with an overall decline of 15.1%. During the sample observation period, the overall difference in Higher Education Competitiveness Level in China showed a trend of first decreasing and then increasing. Specifically, from 2008 to 2016, the overall Gini coefficient of Higher Education Competitiveness Level showed a downward trend year by year, reaching a minimum of 0.323 in 2016, and then rebounding slightly. From 2017 to 2020, the higher education competitiveness level in China showed a slight upward trend during this period. Overall, this indicates that the differences in Higher Education Competitiveness Level among provinces in China are gradually decreasing year by year.

**Table 5.** Differences and Decomposition of Higher Education Competitiveness Level in China

| Year | Gini Coefficient | Intro-regional Difference |                |                | Inter-regional Difference |                        |                        | Contribution Rate (%) |              |                           |
|------|------------------|---------------------------|----------------|----------------|---------------------------|------------------------|------------------------|-----------------------|--------------|---------------------------|
|      |                  | Eastern Region            | Central Region | Western Region | Eastern-Central Region    | Eastern-Western Region | Central-Western Region | Intro-region          | Inter-region | Supervariation on Density |
| 2008 | 0.445            | 0.502                     | 0.331          | 0.221          | 0.377                     | 0.612                  | 0.459                  | 26.20                 | 60.26        | 13.54                     |
| 2009 | 0.428            | 0.491                     | 0.319          | 0.203          | 0.363                     | 0.583                  | 0.439                  | 26.50                 | 58.58        | 14.92                     |
| 2010 | 0.421            | 0.467                     | 0.321          | 0.190          | 0.364                     | 0.573                  | 0.415                  | 26.60                 | 59.17        | 14.23                     |
| 2011 | 0.416            | 0.452                     | 0.328          | 0.201          | 0.359                     | 0.561                  | 0.409                  | 27.15                 | 57.32        | 15.54                     |
| 2012 | 0.405            | 0.442                     | 0.307          | 0.191          | 0.304                     | 0.528                  | 0.408                  | 27.05                 | 56.03        | 16.92                     |
| 2013 | 0.367            | 0.432                     | 0.279          | 0.182          | 0.278                     | 0.509                  | 0.403                  | 26.99                 | 55.26        | 17.75                     |
| 2014 | 0.369            | 0.423                     | 0.285          | 0.179          | 0.289                     | 0.510                  | 0.389                  | 27.08                 | 55.84        | 17.08                     |
| 2015 | 0.326            | 0.369                     | 0.262          | 0.174          | 0.251                     | 0.439                  | 0.349                  | 28.06                 | 51.05        | 20.89                     |
| 2016 | 0.323            | 0.360                     | 0.262          | 0.174          | 0.251                     | 0.435                  | 0.344                  | 28.05                 | 50.94        | 21.01                     |
| 2017 | 0.354            | 0.380                     | 0.285          | 0.187          | 0.296                     | 0.481                  | 0.349                  | 27.62                 | 55.72        | 16.66                     |
| 2018 | 0.355            | 0.394                     | 0.279          | 0.171          | 0.287                     | 0.490                  | 0.359                  | 27.21                 | 56.52        | 16.27                     |
| 2019 | 0.388            | 0.419                     | 0.316          | 0.209          | 0.334                     | 0.518                  | 0.374                  | 27.97                 | 54.25        | 17.78                     |
| 2020 | 0.378            | 0.417                     | 0.301          | 0.211          | 0.328                     | 0.502                  | 0.366                  | 28.07                 | 53.78        | 18.16                     |

## 5.2. Analysis of Intra-regional Differences in Higher Education Competitiveness Level in China

According to the results reported in Table 5 and Figure 6, the overall Gini coefficient of Higher Education Competitiveness Level in China is similar to the intra-regional Gini coefficient of the eastern, central, and western regions, and there are differences in the evolution of the Gini coefficient within each region. The Gini coefficient within the eastern region is higher than the overall Gini coefficient and the Gini coefficient within the central and western regions. From the perspective of the three major regions, the Gini coefficient within the eastern region decreased from 0.502 in 2008 to 0.417 in 2020, a decrease of 16.9%. Among them, the period from 2008 to 2014 was a stage of slight decline, the period from 2014 to 2016 showed a significant decline, and the period from 2017 to 2020 was a stage of slow growth with limited fluctuations. The Gini coefficient within the central region decreased from 0.331 in 2008 to 0.301 in 2020, a decline of 9%, showing a fluctuating downward trend. The Gini coefficient within the western region decreased from 0.221 in 2008 to 0.211 in 2020, a decline of 5%. The Gini coefficient within the western region is only about half of the overall national level. The western region initially had a lower level of higher education and developed more slowly compared to the eastern and central regions, so the difference in the Gini coefficient within the region is smaller. Overall, the internal differences in Higher Education Competitiveness Level in China's three major regions show a narrowing trend.

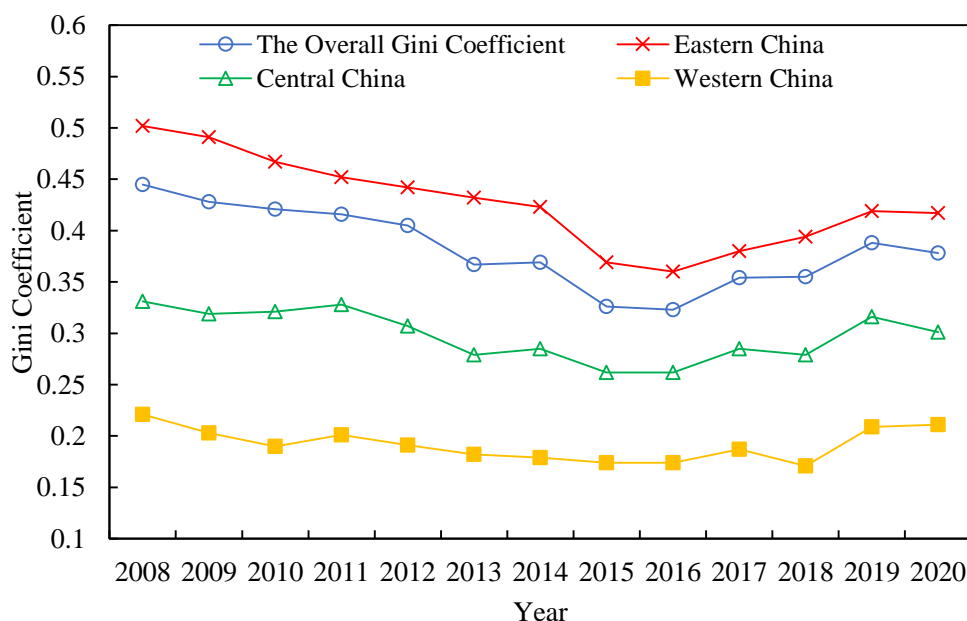

**Figure 6.** Overall Differences and Intra-regional Differences in Higher Education Competitiveness Level in China

## 5.3. Analysis of Inter-regional Differences in Higher Education Competitiveness Level in China

According to the results reported in Table 5 and Figure 7, during the sample observation period, the differences between regions showed a decline or fluctuating downward trend, with similar trends. After a slight decline, there was a brief rise. From 2008 to 2020, the average Gini coefficient of inter-regional differences in Higher Education Competitiveness Level decreased in the following order: Eastern Region - Western Region > Central Region - Western Region > Eastern Region - Central Region. This indicates that the difference in Higher Education Competitiveness Level between the eastern and western regions is the largest, while the difference between the eastern and central regions is relatively smaller. The inter-regional differences between the central region and other regions are relatively stable, and the inter-

regional differences show a narrowing trend. From 2008 to 2020, the inter-regional difference between the eastern and western regions decreased from 0.612 to 0.502, a decline of 19.97%. Among them, the largest decline occurred from 2008 to 2016, with the inter-regional difference between the eastern and western regions decreasing from 0.612 to 0.435, a decline of 28.9%. From 2008 to 2020, the inter-regional difference between the eastern and central regions decreased from 0.377 to 0.328, a decline of 13%. Among them, the largest decline occurred from 2008 to 2016, with the inter-regional difference between the eastern and central regions decreasing from 0.377 to 0.251, a decline of 33.4%. From 2008 to 2020, the inter-regional difference between the central and western regions decreased from 0.459 to 0.366, a decline of 20.3%, showing a fluctuating downward trend.

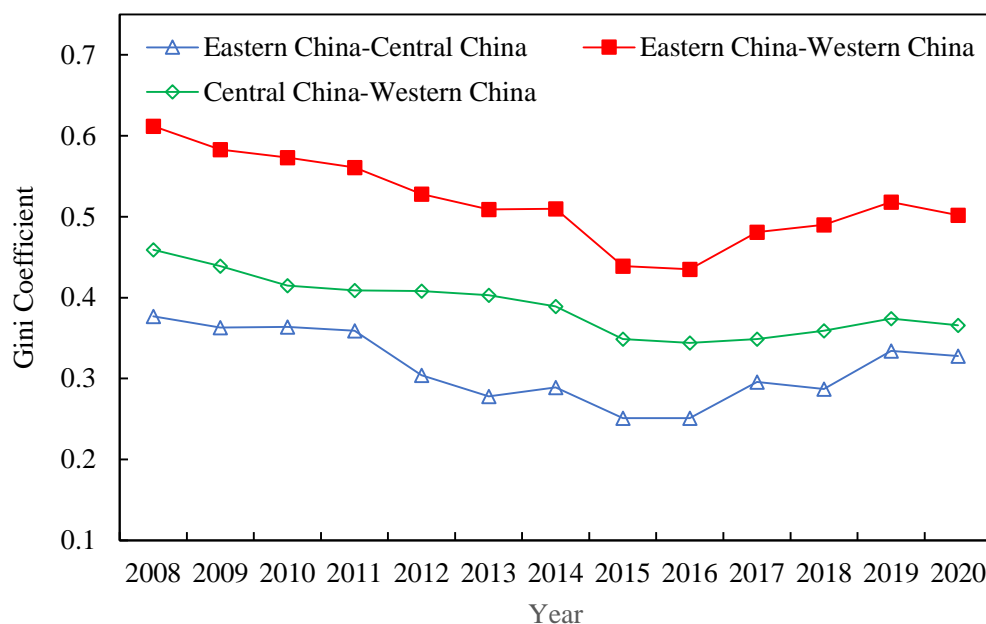

**Figure 7.** Inter-regional Differences in Higher Education Competitiveness Level in China

#### 5.4. Analysis of the Sources of Differences in Higher Education Competitiveness Level in China

From the perspective of spatial sources of regional differences, inter-regional differences, intra-regional differences, and supravariate density are all spatial sources of regional differences in Higher Education Competitiveness Level. Among them, intra-regional differences measure the regional differences in Higher Education Competitiveness Level among provinces within the three major regions; inter-regional differences measure the pure regional differences between regions with high average levels of higher education competitiveness and regions with low levels of higher education competitiveness; supravariate density measures the degree of cross-group crossover of inter-regional outlier values. As shown in Figure 8, inter-regional differences are the main source of regional differences in higher education competitiveness in China. From 2008 to 2020, the average contribution of inter-regional differences to the overall gap reached 55.75%, the average contribution of intra-regional differences to the overall gap was 27.27%, and the average contribution rate of supravariate density was 16.98%. The contribution rate of inter-regional differences in Higher Education Competitiveness Level in China decreased from 60.26% in 2008 to 53.78% in 2020, a decline of 10.75%; the contribution rate of intra-regional differences in 2020 increased by 7.14% compared to 2008, and the contribution rate of supravariate density in 2020 increased by 34.12% compared to 2008. Therefore, improving the Higher Education Competitiveness Level in the central and western regions, especially narrowing the gap between regions, is key to addressing the imbalance in China's higher education development.



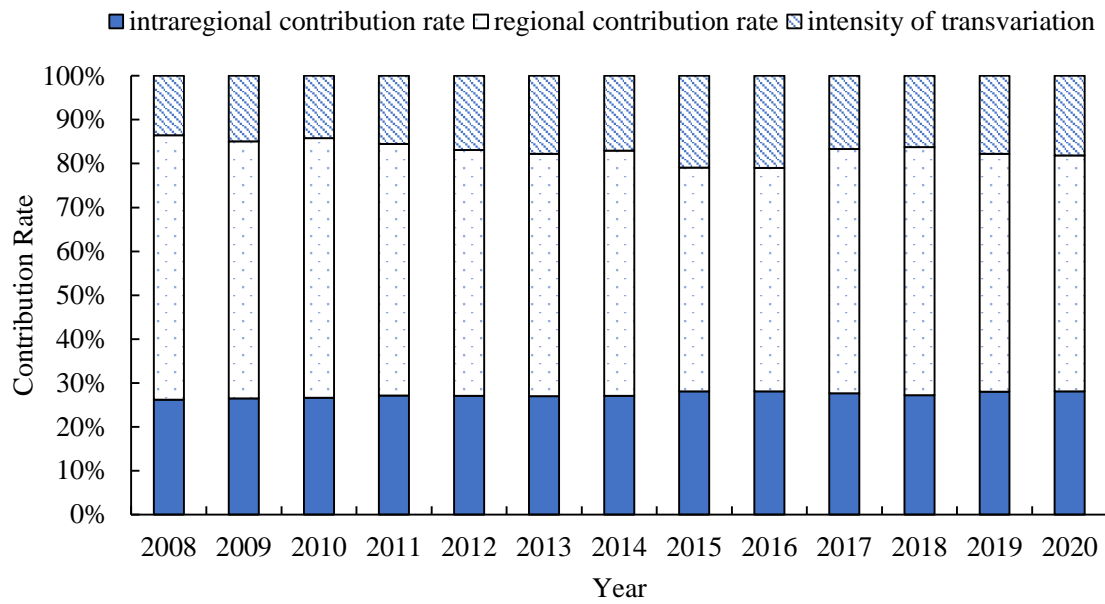

**Figure 8.** Spatial Sources of Regional Differences in Higher Education Competitiveness Level in China

## 6. Conclusions and Implications

In this paper, using the DPSIR model, we constructed an evaluation index system for Higher Education Competitiveness Level from the perspectives of driving force, pressure, state, impact, and response. We employed the entropy weight TOPSIS method to measure the Higher Education Competitiveness Level of 31 provinces in China from 2008 to 2020 and further analyzed their spatio-temporal pattern. Based on this, we analyzed the dynamic evolution and long-term transition trends of Higher Education Competitiveness Level using traditional and spatial Kernel density estimation methods and Markov chain analysis method, and examined the differences and their sources in Higher Education Competitiveness Level using Dagum's Gini coefficient. The research conclusions are as follows:

(1) From the measurement results, during the sample observation period, China's higher education competitiveness level showed a steady upward trend, with the average level of higher education competitiveness rising from 0.282 in 2008 to 0.335 in 2020, an overall increase of 18.79%. However, the overall level remains relatively low, with only one-third of provinces reaching the national average level. There are significant regional differences and distinct regional characteristics, presenting an imbalanced spatial pattern of development with stronger performance in the east and weaker performance in the west.

(2) From the perspective of dynamic evolution, under spatial conditions, the results of static Kernel density estimation and dynamic Kernel density estimation are similar but different. When neighboring provinces' Higher Education Competitiveness Level are at a high level, there is no spatial positive correlation between provinces in both static and dynamic estimation results. When neighboring provinces' Higher Education Competitiveness Level are at medium or low levels, considering the time factor, the spatial positive correlation between provinces is significantly weakened. Traditional Markov chain analysis shows that the development trends of higher education in various provinces in China are relatively stable, and the stability of Higher Education Competitiveness Level in each province gradually weakens with the extension of time span. Spatial Markov chain analysis shows that, considering spatial factors, the Higher Education Competitiveness Level of each province remain unchanged, and it is difficult for the Higher Education Competitiveness Level of each province to achieve a leapfrogging improvement, regardless of whether spatial factors are considered or not.

(3) In terms of regional differences, the overall differences in Higher Education Competitiveness Level show a downward trend, with inter-regional differences being the main source, with an average contribution rate of 55.75%. The differences mainly come from the differences between the three major regions, and the internal differences within the three major regions also show different degrees of downward trends. Among them, the internal differences in the eastern region have the largest decline, followed by the central region, and the western region has the smallest decline. In addition, the differences between the eastern and western regions are the largest, the differences between the central and western regions are intermediate, and the differences between the eastern and central regions are the smallest.

To further improve China's Higher Education Competitiveness Level, reduce regional differences, achieve high-quality and sustainable development of higher education, and promote the construction of China's modern education system, this paper draws the following implications and suggestions based on the above research conclusions:

(1) Thoroughly implement the concept of sustainable development. At present, China's higher education competitiveness level is still relatively low, and local governments and universities should fully recognize the important role of higher education in promoting economic and social development. In October 2019, six departments, including the National Development and Reform Commission, jointly issued the "National Industry-Education Integration Pilot Implementation Plan," proposing to deepen industry-education integration, promote the organic connection of education chains, talent chains, industry chains, and innovation chains, as a strategic measure to promote the mutual penetration, coordination, and promotion of education-oriented development, talent-led development, industry innovation development, and economic high-quality development. The 20th National Congress report pointed out that we should adhere to education-oriented development, self-reliance and self-improvement in science and technology, and talent-driven leadership, and accelerate to make China a powerhouse in terms of education, science and talents. We should establish a mechanism for the coordinated development of higher education and industry clusters, and strive to achieve the integration of talent cultivation with social needs and scientific research innovation with achievement transformation. Universities should rely on their advantages in fields such as enterprises, industries, technologies, and talents, deepen industry-education integration, create cross-disciplinary platforms for applied technology research and transformation, professional ability innovation, and innovation and entrepreneurship incubation, and promote the organic connection of industry chains, innovation chains, education chains, and talent chains.

(2) Adopt tailored development strategies to drive the upward leap of higher education competitiveness. The higher education competitiveness level in the eastern region has always maintained a leading advantage, while the higher education competitiveness level in the western region is relatively lagging. The primary task for the western region is to learn from successful development experiences to improve the basic level of higher education. Continue to increase support for funds, talents, and technology in the central and western regions, provide necessary guarantee conditions for the development of higher education in the central and western regions, and promote the continuous improvement of their higher education competitiveness, gradually narrowing the gap with the eastern region.

(3) The issue of regional disparities in the development of higher education, particularly between the three major regions should be addressed. To achieve a new leap in the level of higher education competitiveness in each province, we need to focus on the leading and linking roles of developed provinces in the east, promote the flow of educational and technological resources, enhance regional relevance, strengthen communication and cooperation among regions, allocate resources rationally, fully utilize and develop the spatial spillover effects of higher education development, drive the radiation effect of developed regions on relatively backward regions, and prevent the further expansion of regional development imbalance, so as to achieve the coordinated development of higher education across multiple regions. Central and western regions should, based on their own resource advantages and in conjunction with

relevant government support policies, tap into resources and talent, strengthen the construction of the higher education system within the region, and enhance the level of higher education competitiveness.

Although this study has measured the level of higher education competitiveness in China and explored regional disparities, there are limitations to this research. Firstly, this study was based on panel data of 31 provinces in China, and the research scale is relatively macro. In the future, panel data at the city level could be used for analysis, as there may be some differences in the status of higher education competitiveness at the small scale, and spatial correlation and spillover effects between small-scale regions may be more obvious. Analyzing at the city level would be helpful in a more comprehensive and detailed analysis of China's higher education competitiveness. Secondly, while this study has conducted in-depth analysis of the current situation of China's higher education competitiveness from multiple perspectives, the driving mechanisms behind this phenomenon require further research. In the future, a driving mechanism model could be constructed to effectively reveal the transmission paths and mechanisms of the various elements of the higher education system.

## References

- [1] Lin L. An evaluation system and its model for educational competitiveness of universities. *International Journal of Emerging Technologies in Learning*, 2020, 15(11): 188–201.
- [2] Tang Zhenmin. Building a high quality higher education system: Time background, connotation direction and realization strategy. *Higher Education Exploration*, 2021(11): 19-24,42.
- [3] Krägeloh C U, Medvedev O N, Hill E M, et al. Improving measurement of trait competitiveness: A rasch analysis of the revised competitiveness index with samples from New Zealand and US university students. *Psychological Reports*, 2019, 122(2): 689–708.
- [4] Lukwago J, Martins A M D A, Tefera O. Drivers and barriers in developing sustainability leadership – a case of natural scientists at Ugandan universities. *International Journal of Sustainability in Higher Education*, 2023, 24(4): 895–910.
- [5] Ritchie-Dunham J L, Gonçalves A C, Huerta M A, et al. Advancing sustainability leadership by shifting relational ‘agreement structures’: a transformational higher education change program. *Journal of Integrative Environmental Sciences*, 2023, 20(1): 2190385.
- [6] Simina P R A. The importance of sustainability for university competitiveness. *Studies in Business and Economics*, 2022, 17(1): 187–201.
- [7] Kamal Y, Yesmin S. Competitiveness of global apparel industry: A study based on transaction cost theory. *Global Business Review*, 2022.
- [8] Peng T, Jin Z, Xiao L. Evaluating low-carbon competitiveness under a DPSIR-Game Theory-TOPSIS model—A case study. *Environment, Development and Sustainability*, Springer Netherlands, 2022, 24(4): 5962–5990.
- [9] Muerza V, Larrodé E, Moreno-Jiménez J M, et al. Multicriteria evaluation of technological competitiveness in diversification processes. An application to the automotive components industry. *International Transactions in Operational Research*, 2023, 1: 1–23.

- [10] Yao L, Maneejuk P, Yamaka W, et al. Quantifying the competitiveness of cultural industry and its impact on Chinese economic growth. *Sustainability*, 2023, 15(1): 1–19.
- [11] Fainshmidt S, Smith A, Judge W Q. National competitiveness and Porter's Diamond Model: The role of MNE penetration and governance quality. *Global Strategy Journal*, 2016, 6(2): 81–104.
- [12] Fang K, Zhou Y, Wang S, et al. Assessing national renewable energy competitiveness of the G20: A revised Porter's Diamond Model. *Renewable and Sustainable Energy Reviews*, 2018, 93(6): 719–731.
- [13] Adamkiewicz H G. The dimensions of national competitiveness: The empirical analysis based on The World Economic Forum's data. *Economics and Business Review*, 2019, 5(3): 92–117.
- [14] Haj Youssef M S, Hussein H M, Christodoulou I. Competitiveness and managerial discretion: an empirical investigation at the national-level. *Competitiveness Review*, 2019, 29(2): 181–203.
- [15] Stoimenova B B. Regional innovation systems and university competitiveness. *International Journal of Innovation*, 2019, 7(2): 227–235.
- [16] Chang J, Liu J. Methods and practices for institutional benchmarking based on research impact and competitiveness: A case study of Shanghai Tech University. *Journal of Data and Information Science*, 2019, 4(3): 55–72.
- [17] Li H L, Yu Y T, IEEE. Research on the Evaluation of Expert Scoring Method in the Competitiveness of High Colleges and Universities of Jiangxi Province. *Proceedings of 2013 6th International Conference On Information Management, Innovation Management and Industrial Engineering*, 2013 (6th International Conference on Information Management, Innovation Management and Industrial Engineering (ICIII)): 448–450.
- [18] Bileviciute E, Draksas R, Nevera A, et al. Competitiveness in higher education: The case of university management. *Journal of Competitiveness*, 2019, 11(4): 5–21.
- [19] Alfaro Bernedo O, Esenarro D, Rodriguez C, et al. The Unified Enterprise Architecture (AEU) as a strategic tool organizational modeling for the functional competitiveness of universities. *3C Empresa. Investigación y pensamiento crítico*, 2021: 63–79.
- [20] Yang Y, Fabus M, Bae K H, et al. A diamond model based analysis for improving the sustainable competitiveness in educational exports by Chinese colleges and universities. *Entrepreneurship and Sustainability Issues*, 2020, 7(3): 1858–1871.
- [21] Estrada-Real A C, Cantu-Ortiz F J. A data analytics approach for university competitiveness: the QS world university rankings. *International Journal on Interactive Design and Manufacturing*, 2022, 16(3): 871–891.
- [22] M Moskovkin V, Saprykina T V, Sizyongo M. Quantitative comparative analysis of country university competitiveness: The case of the near east and south east Asian countries. *Journal of Scientometric Research*, 2023, 11(3): 350–357.
- [23] Kelly A. Measuring research competitiveness in UK universities: introducing the Herfindahl Index to the 2008 and 2014 research assessment exercises. *Assessment and Evaluation in Higher Education*, 2016, 41(8): 1206–1222.

- [24] Sun Y, Wang D, Yang F, et al. Efficiency evaluation of higher education systems in China: A double frontier parallel DEA model. *Computers and Industrial Engineering*, 2023, 176(1): 108979.
- [25] Naderi A. Efficiency measurement of higher education units using multilevel frontier analysis. *Journal of Productivity Analysis*, 2022, 57(1): 79–92.
- [26] Tran T V, Pham T P, Nguyen M H, et al. Economic efficiency of higher education institutions in Vietnam between 2012 and 2016: a DEA analysis. *Journal of Applied Research in Higher Education*, 2023, 15(1): 199–212.
- [27] Duan T, Feng J, Zhou Y, et al. Systematic evaluation of management measure effects on the water environment based on the DPSIR-Tapio decoupling model: A case study in the Chaohu Lake watershed, China. *Science of the Total Environment*, 2021, 801: 149528.
- [28] Yousafzai S, Saeed R, Rahman G, et al. et al. Spatio-temporal assessment of land use dynamics and urbanization: linking with environmental aspects and DPSIR framework approach. *Environmental Science and Pollution Research*, 2022, 29(54): 81337–81350.
- [29] Liu L, Li J, Wang J, et al. The establishment of an eco-environmental evaluation model for southwest China and eastern South Africa based on the DPSIR framework. *Ecological Indicators*, 2022, 145(3): 109687.
- [30] Zhao Y, Zhao X, Fan D, et al. A comprehensive method for refining essential SDGs variables for land degradation monitoring based on the DPSIR framework. *International Journal of Digital Earth*, 2023, 16(1): 741–761.
- [31] Wan C, Zhang D, Yan X, et al. A novel model for the quantitative evaluation of green port development – A case study of major ports in China. *Transportation Research Part D: Transport and Environment*, 2018, 61: 431–443.
- [32] Zhao R, Fang C, Liu H, et al. Evaluating urban ecosystem resilience using the DPSIR framework and the ENA model: A case study of 35 cities in China. *Sustainable Cities and Society*, 2021, 72(10): 102997.
- [33] Yanli L. Exploration on smart classroom construction based on educational ecology. *Journal of Education and Culture Studies*, 2020, 4(4): 112–116.
- [34] Wang M, Zhou C. How does graduate training promote sustainable development of higher education: Evidence from China’s “Double First-Class” universities’ programs. *Sustainability*, 2023, 15(2): 944.
- [35] Zhao X, Yin H, Fang C, et al. For the sustainable development of universities: Exploring the external factors impacting returned early career academic’s research performance in China. *Sustainability*, 2021, 13(3): 1–20.
- [36] Abdel-Basset M, Gunasekaran M, Mai M, et al. A framework for risk assessment, management and evaluation: Economic tool for quantifying risks in supply chain. *Future Generation Computer Systems*, 2018, 90.
- [37] Ren Z. Evaluation method of port enterprise product quality based on entropy weight TOPSIS. *Journal of Coastal Research*, 2020, 103(9): 766.
- [38] Yang Minghai, Zhang Hongxia, Sun Yanan. Regional disparity and distribution of innovation capability in seven urban agglomerations. *Journal of Quantitative & Technological Economics*, 2017, 34(3): 19.

- [39] Lu X, Kuang B, Li J. Regional difference decomposition and policy implications of China's urban land use efficiency under the environmental restriction. *Habitat International*, Elsevier, 2018, 77(7): 32–39.
- [40] Li Z, Cai Y, Hu S. Research on systemic financial risk measurement based on HMM and text mining: A case of China Financial Market. *IEEE Access*, 2021, 9: 22171–22185.
- [41] Mai Q, Bai M, Li L. Study on the dynamic evolution and regional differences of the level of high-quality economic and social development in China. *Sustainability*, 2023, 15(1).
- [42] Zeng Haomiao, Zhang Xuemin, Qilin Ren, et al. Research on influencing factors and spatial equilibrium of vocational education resources distribution. *Acta Geographica Sinica*, 2022, 77(12): 14.
- [43] Yussif K, Domphe E B, Gasparatos A. Sustainability of urban expansion in Africa: a systematic literature review using the Drivers–Pressures–State–Impact–response (DPSIR) framework. *Sustainability Science*, 2023, 18(3): 1459–1479.
